# Supplementary material
Source: bioRxiv or medRxiv preprint supplement (https://medrxiv.org/highwire/filestream/75692/field_highwire_adjunct_files/0/2020.04.03.20052373-1.pdf)
Supplement: Supplementary file [file 2020.04.03.20052373-1.pdf]

## Supplementary Online Content

Siedner MJ, Harling G, Reynolds Z, Gilbert RF, Venkataramani AS, Tsai AC. Social distancing to slow the U.S. COVID-19 epidemic: interrupted time-series analysis.

**eAppendix.** Materials and Methods

**eTable 1.** Dates of implementation of statewide social distancing measures, by type of measure and by state

**eTable 2.** Sensitivity analyses for the effect of implementation of any statewide social distancing measure on daily epidemic growth rate

**eTable 3.** Sensitivity analyses for the effect of implementation of statewide restriction on internal movement on daily epidemic growth rate

**eFigure.** Timeline of implementation of first statewide social distancing measures and statewide restrictions on internal movement

## eAppendix. Materials and Methods

### *Identification of statewide social distancing measures*

Our strategy to identify all statewide social distancing measures involved the triangulation of data from state government and third-party sources. First, during March 25-31, 2020 we searched the web sites for all 50 U.S. state and commonwealth governments and the District of Columbia to identify all statewide social distancing measures implemented from January 21-March 31, 2020 to address the spread of coronavirus infection, including executive orders; legislation; state of emergency or public health emergency declarations; major disaster declarations; restrictions on travel or internal movement; limitations on mass gatherings; and closures of schools or workplaces. Our searches included the web sites for the respective state governments, state departments of education, state departments of public health, and any state-sponsored COVID-specific web sites.

To ensure the completeness of our search, we then cross-referenced our findings against several third-party sources:

- Al Jazeera Media Network. Lockdowns, closures: How is each U.S. state handling coronavirus? *Al Jazeera*. Available at: <https://www.aljazeera.com/news/2020/03/emergencies-closures-states-handling-coronavirus-200317213356419.html>. Last accessed March 31, 2020.
- The Council of State Governments. COVID-19 resources for state leaders. Available at: <https://web.csg.org/covid19/executive-orders/>. Last accessed March 31, 2020.
- Gershman D. A guide to state coronavirus lockdowns. *Wall Street Journal*. Available at: <https://www.wsj.com/articles/a-state-by-state-guide-to-coronavirus-lockdowns-11584749351>. Last accessed March 31, 2020.
- Mervosh S, Lu D, Swales V. See which states and cities have told residents to stay at home. *New York Times*. Available at: <https://www.nytimes.com/interactive/2020/us/coronavirus-stay-at-home-order.html>. Last accessed March 31, 2020.
- MultiState. COVID-19 policy tracker. Available at: <https://www.multistate.us/pages/covid-19-policy-tracker>. Last accessed March 31, 2020.

In the event we identified any discrepancies, official state government sources were assumed to have precedence.

To be included in our analysis, social distancing measures had to meet the following criteria:

1. The social distancing measure had to have been announced and implemented by March 31, 2020. For example, on March 30, the Mayor of Washington, D.C. issued a stay-at-home order that will go into effect on April 1. This order was not included in our analysis.
2. The social distancing measure had to be binding. For example, on March 15, the Governor of Iowa issued a statement recommending that all public schools close for four weeks beginning March 16. On March 17, the Governor then issued a State of Public Health Disaster Emergency that included, among other provisions, mandatory closures of bars, eateries, and other facilities. Thus, in our dataset the state of Iowa was coded as implementing its first statewide social distancing measure on March 17, and the recommendation on school closings was not included.
3. The social distancing measure had to be binding statewide. As another example, on March 13, the Jefferson County (Alabama) Board of Education issued a statement closing all public schools beginning March 16. On the same day, the Governor of Alabama issued a proclamation that public schools would be closed beginning March 18. Thus, in our dataset the state of Alabama was coded as implementing its first statewide social distancing measure on March 18.

We categorized social distancing measures using a previously published typology (1): closures of schools, closures of workplaces, cancellations of public events, restrictions on internal movement, and closures of state borders. The complete list of dates of implementation of statewide social distancing measures, by type of measure and by state, is shown in **eTable 1**. The timeline of implementation of these measures is shown in the **eFigure**.

### *Sensitivity analyses*

In our analysis, we examined the effects of two types of statewide social distancing measures. First, we examined the effect of implementing any type of statewide social distancing measure. Second, we examined the effect of implementing a statewide restriction on internal movement, colloquially referred to as a “lockdown.”

To assess the robustness of our findings, we conducted several sensitivity analyses. First, to adjust for potential confounding by population density, we adjusted our estimates by state-level population density (2, 3). To account for weekly periodicity that could also coincide with implementation of social distancing measures, we also adjusted for day of the week (4, 5). In the analysis estimating the effect of the first statewide social distancing measure of any kind (second row, **eTable 2**) the magnitude of the estimated regression coefficient was reduced by approximately one-fourth but remained statistically significant, implying a reduction in the daily growth rate of 0.6% per day ( $b=-0.006$ ; 95% CI, -0.012 to -0.00026). The estimated effect of statewide restrictions on internal movement was not statistically significant (second row, **eTable 3**).

Second, although implementation of social distancing measures is most likely to show population-level effectiveness in reducing coronavirus transmission after 3 days given its estimated incubation period (6), we refitted the regression models specifying longer incubation periods of 4 and 5 days. As can be observed in the third row of **eTable 2**, lengthening the incubation period to 4 days attenuated both the magnitude and statistical significance of the estimated regression coefficient on the primary variable of interest. In the analysis estimating the effect of the first statewide social distancing measure of any kind, lengthening the incubation period to 5 days further reduced the magnitude of the estimated regression coefficient such that it was no longer statistically significant (fourth row, **eTable 2**). Whether the incubation period was specified as 4 days or 5 days, the estimated effect of statewide restrictions on internal movement was not statistically significant (third and fourth rows, **eTable 3**).

Third, to assess the extent to which early vs. late implementation of social distancing measures modified the effects of these actions (7), we stratified our estimates by the size of the epidemic in the state. In the analysis estimating the effect of the first statewide social distancing measure of any kind, epidemic size was categorized into  $<100$  versus  $\geq 100$  cases at the time the first statewide social distancing measure was implemented. In the analysis estimating the effect of statewide restrictions on movement, which were implemented a median of 10 days after the first social distancing measure, epidemic size was categorized into  $<500$  versus  $\geq 500$  cases at the time the first statewide restriction on internal movement was implemented. As can be observed in the fifth and sixth rows of **eTable 2** and **eTable 3**, none of the stratified estimates were statistically significant, suggesting that implementation of social distancing measures was similarly effective in epidemics of smaller vs. larger size.

**eTable 1.** Dates of implementation of statewide social distancing measures, by type of measure and by state

| State      | Date    | A | B | C | D | E | Source(s)                                                                                                                                                                                                                                                                                                                                                                                                           |
|------------|---------|---|---|---|---|---|---------------------------------------------------------------------------------------------------------------------------------------------------------------------------------------------------------------------------------------------------------------------------------------------------------------------------------------------------------------------------------------------------------------------|
| Alabama    | 3/18/20 | P |   |   |   |   | <ul style="list-style-type: none"> <li>• <a href="https://governor.alabama.gov/newsroom/2020/03/supplemental-state-of-emergency-coronavirus-covid-19/">https://governor.alabama.gov/newsroom/2020/03/supplemental-state-of-emergency-coronavirus-covid-19/</a></li> </ul>                                                                                                                                           |
| Alabama    | 3/19/20 | P |   | P |   |   | <ul style="list-style-type: none"> <li>• <a href="https://governor.alabama.gov/assets/2020/03/Alabama-State-Health-Officer-Statewide-Social-Distancing-Order-3.19.20.pdf">https://governor.alabama.gov/assets/2020/03/Alabama-State-Health-Officer-Statewide-Social-Distancing-Order-3.19.20.pdf</a></li> </ul>                                                                                                     |
| Alabama    | 3/28/20 |   | P |   |   |   | <ul style="list-style-type: none"> <li>• <a href="https://governor.alabama.gov/assets/2020/03/Amended-Statewide-Social-Distancing-SHO-Order-3.27.2020-FINAL.pdf">https://governor.alabama.gov/assets/2020/03/Amended-Statewide-Social-Distancing-SHO-Order-3.27.2020-FINAL.pdf</a></li> </ul>                                                                                                                       |
| Alaska     | 3/14/20 |   |   | P |   |   | <ul style="list-style-type: none"> <li>• <a href="https://gov.alaska.gov/wp-content/uploads/sites/2/03132020-COVID-19-Health-Mandate-001.pdf">https://gov.alaska.gov/wp-content/uploads/sites/2/03132020-COVID-19-Health-Mandate-001.pdf</a></li> </ul>                                                                                                                                                             |
| Alaska     | 3/16/20 | P |   |   |   |   | <ul style="list-style-type: none"> <li>• <a href="https://gov.alaska.gov/home/covid19-healthmandates/">https://gov.alaska.gov/home/covid19-healthmandates/</a></li> <li>• <a href="https://gov.alaska.gov/wp-content/uploads/sites/2/03132020-COVID-19-Health-Mandate-001.pdf">https://gov.alaska.gov/wp-content/uploads/sites/2/03132020-COVID-19-Health-Mandate-001.pdf</a></li> </ul>                            |
| Alaska     | 3/17/20 |   |   | P |   | P | <ul style="list-style-type: none"> <li>• <a href="https://gov.alaska.gov/home/covid19-healthmandates/">https://gov.alaska.gov/home/covid19-healthmandates/</a></li> </ul>                                                                                                                                                                                                                                           |
| Alaska     | 3/18/20 |   |   | P |   |   | <ul style="list-style-type: none"> <li>• <a href="https://gov.alaska.gov/home/covid19-healthmandates/">https://gov.alaska.gov/home/covid19-healthmandates/</a></li> </ul>                                                                                                                                                                                                                                           |
| Alaska     | 3/20/20 |   |   |   |   |   | <ul style="list-style-type: none"> <li>• <a href="https://gov.alaska.gov/home/covid19-healthmandates/">https://gov.alaska.gov/home/covid19-healthmandates/</a></li> </ul>                                                                                                                                                                                                                                           |
| Alaska     | 3/24/20 |   | P | P |   |   | <ul style="list-style-type: none"> <li>• <a href="https://gov.alaska.gov/home/covid19-healthmandates/">https://gov.alaska.gov/home/covid19-healthmandates/</a></li> </ul>                                                                                                                                                                                                                                           |
| Alaska     | 3/25/20 |   |   |   |   | P | <ul style="list-style-type: none"> <li>• <a href="https://gov.alaska.gov/home/covid19-healthmandates/">https://gov.alaska.gov/home/covid19-healthmandates/</a></li> </ul>                                                                                                                                                                                                                                           |
| Alaska     | 3/28/20 |   |   |   | P |   | <ul style="list-style-type: none"> <li>• <a href="https://gov.alaska.gov/wp-content/uploads/sites/2/03272020-SOA-COVID-19-Health-Mandate-011.pdf">https://gov.alaska.gov/wp-content/uploads/sites/2/03272020-SOA-COVID-19-Health-Mandate-011.pdf</a></li> </ul>                                                                                                                                                     |
| Arizona    | 3/16/20 | P |   |   |   |   | <ul style="list-style-type: none"> <li>• <a href="https://azgovernor.gov/governor/blog/2020/03/open-letter-arizona-families-educators-school-leaders-and-education-community">https://azgovernor.gov/governor/blog/2020/03/open-letter-arizona-families-educators-school-leaders-and-education-community</a></li> </ul>                                                                                             |
| Arizona    | 3/20/20 |   |   | P |   |   | <ul style="list-style-type: none"> <li>• <a href="https://azgovernor.gov/sites/default/files/eo_2020-09_3.pdf">https://azgovernor.gov/sites/default/files/eo_2020-09_3.pdf</a></li> </ul>                                                                                                                                                                                                                           |
| Arizona    | 3/31/20 |   | P |   | P |   | <ul style="list-style-type: none"> <li>• <a href="https://www.azdhs.gov/documents/preparedness/epidemiology-disease-control/infectious-disease-epidemiology/novel-coronavirus/eo-stay-home-stay-healthy-stay-connected.pdf">https://www.azdhs.gov/documents/preparedness/epidemiology-disease-control/infectious-disease-epidemiology/novel-coronavirus/eo-stay-home-stay-healthy-stay-connected.pdf</a></li> </ul> |
| Arkansas   | 3/19/20 | P | P | P |   |   | <ul style="list-style-type: none"> <li>• <a href="https://www.healthy.arkansas.gov/images/uploads/pdf/Directive_03.19.2020_final.pdf">https://www.healthy.arkansas.gov/images/uploads/pdf/Directive_03.19.2020_final.pdf</a></li> </ul>                                                                                                                                                                             |
| Arkansas   | 3/25/20 |   |   | P |   |   | <ul style="list-style-type: none"> <li>• <a href="https://www.healthy.arkansas.gov/images/uploads/pdf/Barber_Body_Art_Cosmetology_Massage_Therapy_Medical_Spas_Schools_FINAL.pdf">https://www.healthy.arkansas.gov/images/uploads/pdf/Barber_Body_Art_Cosmetology_Massage_Therapy_Medical_Spas_Schools_FINAL.pdf</a></li> </ul>                                                                                     |
| Arkansas   | 3/26/20 |   |   | P |   |   | <ul style="list-style-type: none"> <li>• <a href="https://governor.arkansas.gov/images/uploads/executiveOrders/EO_20-10_.pdf">https://governor.arkansas.gov/images/uploads/executiveOrders/EO_20-10_.pdf</a></li> </ul>                                                                                                                                                                                             |
| California | 3/11/20 |   |   | P |   |   | <ul style="list-style-type: none"> <li>• <a href="https://www.gov.ca.gov/2020/03/11/california-public-health-experts-mass-gatherings-should-be-postponed-or-canceled-statewide-to-slow-the-spread-of-covid-19/">https://www.gov.ca.gov/2020/03/11/california-public-health-experts-mass-gatherings-should-be-postponed-or-canceled-statewide-to-slow-the-spread-of-covid-19/</a></li> </ul>                         |
| California | 3/17/20 |   |   | P |   |   | <ul style="list-style-type: none"> <li>• <a href="https://www.cdph.ca.gov/Programs/CID/DCDC/CDPH%20Document%20Library/COVID-19/Coronavirus%20Disease%202019%20and%20Food%20Beverage%20Other%20Services%20-%20AOL.pdf">https://www.cdph.ca.gov/Programs/CID/DCDC/CDPH%20Document%20Library/COVID-19/Coronavirus%20Disease%202019%20and%20Food%20Beverage%20Other%20Services%20-%20AOL.pdf</a></li> </ul>             |
| California | 3/19/20 | P | P |   | P |   | <ul style="list-style-type: none"> <li>• <a href="https://www.gov.ca.gov/wp-content/uploads/2020/03/3.19.20-attested-EO-N-33-20-COVID-19-HEALTH-ORDER.pdf">https://www.gov.ca.gov/wp-content/uploads/2020/03/3.19.20-attested-EO-N-33-20-COVID-19-HEALTH-ORDER.pdf</a></li> </ul>                                                                                                                                   |
| Colorado   | 3/17/20 |   |   | P |   |   | <ul style="list-style-type: none"> <li>• <a href="https://www.colorado.gov/pacific/sites/default/files/atoms/files/Bars%20Restaurants%20PH%20order.pdf">https://www.colorado.gov/pacific/sites/default/files/atoms/files/Bars%20Restaurants%20PH%20order.pdf</a></li> </ul>                                                                                                                                         |
| Colorado   | 3/19/20 |   |   | P |   |   | <ul style="list-style-type: none"> <li>• <a href="https://covid19.colorado.gov/public-health-executive-orders-explained">https://covid19.colorado.gov/public-health-executive-orders-explained</a></li> <li>• <a href="https://drive.google.com/file/d/14X5zbYPY7LJ8zzzSv_GcApJauFmsc5Ju/view">https://drive.google.com/file/d/14X5zbYPY7LJ8zzzSv_GcApJauFmsc5Ju/view</a></li> </ul>                                |
| Colorado   | 3/23/20 | P |   | P |   |   | <ul style="list-style-type: none"> <li>• <a href="https://drive.google.com/file/d/1ecMEQj3F3qeEI3qNMtl_kAlk3ya3FbVH3/view">https://drive.google.com/file/d/1ecMEQj3F3qeEI3qNMtl_kAlk3ya3FbVH3/view</a></li> <li>• <a href="https://drive.google.com/file/d/1KNqVxX8m2Y_cInIMSqlZeMoxIIAFtNo0/view">https://drive.google.com/file/d/1KNqVxX8m2Y_cInIMSqlZeMoxIIAFtNo0/view</a></li> </ul>                            |
| Colorado   | 3/26/20 |   | P |   | P |   | <ul style="list-style-type: none"> <li>• <a href="https://drive.google.com/file/d/1O1EDCY6-A6QBKxzDImCSF8bBBdOOI3Km/view">https://drive.google.com/file/d/1O1EDCY6-A6QBKxzDImCSF8bBBdOOI3Km/view</a></li> </ul>                                                                                                                                                                                                     |

|                      |         |   |   |   |                                                                                                                                                                                                                                                                                                                                                                                                                                                                                                                                                                                                                                                                    |
|----------------------|---------|---|---|---|--------------------------------------------------------------------------------------------------------------------------------------------------------------------------------------------------------------------------------------------------------------------------------------------------------------------------------------------------------------------------------------------------------------------------------------------------------------------------------------------------------------------------------------------------------------------------------------------------------------------------------------------------------------------|
| Connecticut          | 3/12/20 |   | P |   | <ul style="list-style-type: none"> <li>• <a href="https://portal.ct.gov/-/media/Office-of-the-Governor/Executive-Orders/Lamont-Executive-Orders/Executive-Order-No-7.pdf">https://portal.ct.gov/-/media/Office-of-the-Governor/Executive-Orders/Lamont-Executive-Orders/Executive-Order-No-7.pdf</a></li> </ul>                                                                                                                                                                                                                                                                                                                                                    |
| Connecticut          | 3/16/20 |   | P |   | <ul style="list-style-type: none"> <li>• <a href="https://portal.ct.gov/-/media/Office-of-the-Governor/Executive-Orders/Lamont-Executive-Orders/Executive-Order-No-7D.pdf">https://portal.ct.gov/-/media/Office-of-the-Governor/Executive-Orders/Lamont-Executive-Orders/Executive-Order-No-7D.pdf</a></li> </ul>                                                                                                                                                                                                                                                                                                                                                  |
| Connecticut          | 3/17/20 | P |   |   | <ul style="list-style-type: none"> <li>• <a href="https://portal.ct.gov/-/media/Office-of-the-Governor/Executive-Orders/Lamont-Executive-Orders/Executive-Order-No-7C.pdf">https://portal.ct.gov/-/media/Office-of-the-Governor/Executive-Orders/Lamont-Executive-Orders/Executive-Order-No-7C.pdf</a></li> </ul>                                                                                                                                                                                                                                                                                                                                                  |
| Connecticut          | 3/19/20 |   | P |   | <ul style="list-style-type: none"> <li>• <a href="https://portal.ct.gov/-/media/Office-of-the-Governor/Executive-Orders/Lamont-Executive-Orders/Executive-Order-No-7E.pdf">https://portal.ct.gov/-/media/Office-of-the-Governor/Executive-Orders/Lamont-Executive-Orders/Executive-Order-No-7E.pdf</a></li> </ul>                                                                                                                                                                                                                                                                                                                                                  |
| Connecticut          | 3/23/20 |   | P | P | <ul style="list-style-type: none"> <li>• <a href="https://portal.ct.gov/Office-of-the-Governor/News/Press-Releases/2020/03-2020/Governor-Lamont-Releases-Guidance-to-Businesses-on-Order-Asking-Connecticut-to-Stay-Safe-Stay-Home">https://portal.ct.gov/Office-of-the-Governor/News/Press-Releases/2020/03-2020/Governor-Lamont-Releases-Guidance-to-Businesses-on-Order-Asking-Connecticut-to-Stay-Safe-Stay-Home</a></li> </ul>                                                                                                                                                                                                                                |
| Connecticut          | 3/26/20 |   | P |   | <ul style="list-style-type: none"> <li>• <a href="https://portal.ct.gov/-/media/Office-of-the-Governor/Executive-Orders/Lamont-Executive-Orders/Executive-Order-No-7N.pdf">https://portal.ct.gov/-/media/Office-of-the-Governor/Executive-Orders/Lamont-Executive-Orders/Executive-Order-No-7N.pdf</a></li> </ul>                                                                                                                                                                                                                                                                                                                                                  |
| Delaware             | 3/16/20 | P |   | P | <ul style="list-style-type: none"> <li>• <a href="https://governor.delaware.gov/wp-content/uploads/sites/24/2020/03/School-Letter-Governor-Carney-03132020.pdf">https://governor.delaware.gov/wp-content/uploads/sites/24/2020/03/School-Letter-Governor-Carney-03132020.pdf</a></li> <li>• <a href="https://governor.delaware.gov/wp-content/uploads/sites/24/2020/03/Second-Modification-to-the-State-of-Emergency.pdf">https://governor.delaware.gov/wp-content/uploads/sites/24/2020/03/Second-Modification-to-the-State-of-Emergency.pdf</a></li> </ul>                                                                                                       |
| Delaware             | 3/24/20 |   | P | P | <ul style="list-style-type: none"> <li>• <a href="https://governor.delaware.gov/wp-content/uploads/sites/24/2020/03/Fifth-Modification-to-State-of-Emergency-03222020.pdf">https://governor.delaware.gov/wp-content/uploads/sites/24/2020/03/Fifth-Modification-to-State-of-Emergency-03222020.pdf</a></li> </ul>                                                                                                                                                                                                                                                                                                                                                  |
| District of Columbia | 3/13/20 |   |   | P | <ul style="list-style-type: none"> <li>• <a href="https://coronavirus.dc.gov/sites/default/files/dc/sites/coronavirus/release_content/attachments/DOH_Rulemaking_Mass-Gatherings.pdf">https://coronavirus.dc.gov/sites/default/files/dc/sites/coronavirus/release_content/attachments/DOH_Rulemaking_Mass-Gatherings.pdf</a></li> </ul>                                                                                                                                                                                                                                                                                                                            |
| District of Columbia | 3/16/20 | P |   | P | <ul style="list-style-type: none"> <li>• <a href="https://mayor.dc.gov/sites/default/files/dc/sites/mayoromb/publication/attachments/MO-Prohibition-on-Mass-Gatherings-During-Public-Health-Emergency.pdf">https://mayor.dc.gov/sites/default/files/dc/sites/mayoromb/publication/attachments/MO-Prohibition-on-Mass-Gatherings-During-Public-Health-Emergency.pdf</a></li> <li>• <a href="https://dcps.dc.gov/sites/default/files/dc/sites/dcpcs/page_content/attachments/DCPS_SchoolClosure_031320_Final_English.pdf">https://dcps.dc.gov/sites/default/files/dc/sites/dcpcs/page_content/attachments/DCPS_SchoolClosure_031320_Final_English.pdf</a></li> </ul> |
| District of Columbia | 3/25/20 |   | P |   | <ul style="list-style-type: none"> <li>• <a href="https://coronavirus.dc.gov/sites/default/files/dc/sites/mayoromb/release_content/attachments/Mayor%27s%20Order%202020-053%20Closure%20of%20Non-Essential%20Businesses%20and%20Prohibiti....pdf">https://coronavirus.dc.gov/sites/default/files/dc/sites/mayoromb/release_content/attachments/Mayor%27s%20Order%202020-053%20Closure%20of%20Non-Essential%20Businesses%20and%20Prohibiti....pdf</a></li> </ul>                                                                                                                                                                                                    |
| District of Columbia | 4/1/20  |   |   | P | <ul style="list-style-type: none"> <li>• <a href="https://mayor.dc.gov/release/mayor-bowser-issues-stay-home-order">https://mayor.dc.gov/release/mayor-bowser-issues-stay-home-order</a></li> </ul>                                                                                                                                                                                                                                                                                                                                                                                                                                                                |
| Florida              | 3/16/20 | P |   |   | <ul style="list-style-type: none"> <li>• <a href="http://www.fldoe.org/core/fileparse.php/19861/urlt/Florida-2020-BreakDates.pdf">http://www.fldoe.org/core/fileparse.php/19861/urlt/Florida-2020-BreakDates.pdf</a></li> <li>• <a href="http://www.fldoe.org/newsroom/latest-news/florida-department-of-education-announces-additional-guidance-for-the-2019-20-school-year.shtml">http://www.fldoe.org/newsroom/latest-news/florida-department-of-education-announces-additional-guidance-for-the-2019-20-school-year.shtml</a></li> </ul>                                                                                                                       |
| Florida              | 3/17/20 |   | P |   | <ul style="list-style-type: none"> <li>• <a href="https://www.flgov.com/wp-content/uploads/2020/03/EO-20-68.pdf">https://www.flgov.com/wp-content/uploads/2020/03/EO-20-68.pdf</a></li> </ul>                                                                                                                                                                                                                                                                                                                                                                                                                                                                      |
| Florida              | 3/20/20 |   | P |   | <ul style="list-style-type: none"> <li>• <a href="https://www.flgov.com/wp-content/uploads/orders/2020/EO_20-71.pdf">https://www.flgov.com/wp-content/uploads/orders/2020/EO_20-71.pdf</a></li> <li>• <a href="https://www.flgov.com/wp-content/uploads/orders/2020/EO_20-70.pdf">https://www.flgov.com/wp-content/uploads/orders/2020/EO_20-70.pdf</a></li> </ul>                                                                                                                                                                                                                                                                                                 |
| Florida              | 3/24/20 |   |   | P | <ul style="list-style-type: none"> <li>• <a href="https://www.flgov.com/wp-content/uploads/2020/03/EO-20-80.pdf">https://www.flgov.com/wp-content/uploads/2020/03/EO-20-80.pdf</a></li> </ul>                                                                                                                                                                                                                                                                                                                                                                                                                                                                      |
| Georgia              | 3/18/20 | P |   |   | <ul style="list-style-type: none"> <li>• <a href="https://gov.georgia.gov/executive-action/executive-orders/2020-executive-orders">https://gov.georgia.gov/executive-action/executive-orders/2020-executive-orders</a></li> </ul>                                                                                                                                                                                                                                                                                                                                                                                                                                  |
| Georgia              | 3/24/20 |   | P | P | <ul style="list-style-type: none"> <li>• <a href="https://gov.georgia.gov/document/2020-executive-order/03232001/download">https://gov.georgia.gov/document/2020-executive-order/03232001/download</a></li> <li>• <a href="https://gov.georgia.gov/executive-action/executive-orders/2020-executive-orders">https://gov.georgia.gov/executive-action/executive-orders/2020-executive-orders</a></li> </ul>                                                                                                                                                                                                                                                         |
| Hawaii               | 3/15/20 | P |   |   | <ul style="list-style-type: none"> <li>• <a href="http://www.hawaiipublicschools.org/DOE%20Forms/Emergencies/2020-03-15-Spring-Break-Extension-All-Schools-LTP.pdf">http://www.hawaiipublicschools.org/DOE%20Forms/Emergencies/2020-03-15-Spring-Break-Extension-All-Schools-LTP.pdf</a></li> </ul>                                                                                                                                                                                                                                                                                                                                                                |
| Hawaii               | 3/18/20 |   | P |   | <ul style="list-style-type: none"> <li>• <a href="https://governor.hawaii.gov/newsroom/latest-news/dlnr-news-release-covid-19-leads-to-parks-and-facilities-closures-march-17-2020/">https://governor.hawaii.gov/newsroom/latest-news/dlnr-news-release-covid-19-leads-to-parks-and-facilities-closures-march-17-2020/</a></li> </ul>                                                                                                                                                                                                                                                                                                                              |

|           |         |   |   |   |                                                                                                                                                                                                                                                                                                                                                                                                                                                                                                                                                                                                                                                                                                            |
|-----------|---------|---|---|---|------------------------------------------------------------------------------------------------------------------------------------------------------------------------------------------------------------------------------------------------------------------------------------------------------------------------------------------------------------------------------------------------------------------------------------------------------------------------------------------------------------------------------------------------------------------------------------------------------------------------------------------------------------------------------------------------------------|
| Hawaii    | 3/20/20 |   | P |   | <ul style="list-style-type: none"> <li>• <a href="https://governor.hawaii.gov/newsroom/latest-news/proper-use-of-covid-19-tests-imperative-there-is-a-current-shortage-of-hand-sanitizers-and-toilet-paper-in-hawaii-in-part-because-of-the-publics-over-reaction-to-covid-19-the-hawai/">https://governor.hawaii.gov/newsroom/latest-news/proper-use-of-covid-19-tests-imperative-there-is-a-current-shortage-of-hand-sanitizers-and-toilet-paper-in-hawaii-in-part-because-of-the-publics-over-reaction-to-covid-19-the-hawai/</a></li> </ul>                                                                                                                                                            |
| Hawaii    | 3/25/20 |   | P | P | <ul style="list-style-type: none"> <li>• <a href="https://governor.hawaii.gov/newsroom/latest-news/office-of-the-governor-news-release-governor-ige-issues-statewide-order-to-stay-at-home-work-from-home-to-fight-covid-19/">https://governor.hawaii.gov/newsroom/latest-news/office-of-the-governor-news-release-governor-ige-issues-statewide-order-to-stay-at-home-work-from-home-to-fight-covid-19/</a></li> <li>• <a href="https://hawaiicovid19.com/wp-content/uploads/2020/03/2003162-ATG_Third-Supplementary-Proclamation-for-COVID-19-signed-12.pdf">https://hawaiicovid19.com/wp-content/uploads/2020/03/2003162-ATG_Third-Supplementary-Proclamation-for-COVID-19-signed-12.pdf</a></li> </ul> |
| Hawaii    | 3/26/20 |   |   | P | <ul style="list-style-type: none"> <li>• <a href="https://governor.hawaii.gov/wp-content/uploads/2020/03/2003152-ATG_Second-Supplementary-Proclamation-for-COVID-19-signed.pdf">https://governor.hawaii.gov/wp-content/uploads/2020/03/2003152-ATG_Second-Supplementary-Proclamation-for-COVID-19-signed.pdf</a></li> </ul>                                                                                                                                                                                                                                                                                                                                                                                |
| Idaho     | 3/25/20 | P | P | P | <ul style="list-style-type: none"> <li>• <a href="https://coronavirus.idaho.gov/wp-content/uploads/sites/127/2020/03/statewide-stay-home-order_032520.pdf">https://coronavirus.idaho.gov/wp-content/uploads/sites/127/2020/03/statewide-stay-home-order_032520.pdf</a></li> <li>• <a href="https://www.sde.idaho.gov/">https://www.sde.idaho.gov/</a></li> </ul>                                                                                                                                                                                                                                                                                                                                           |
| Illinois  | 3/13/20 |   |   | P | <ul style="list-style-type: none"> <li>• <a href="https://www2.illinois.gov/Documents/ExecOrders/2020/ExecutiveOrder-2020-04.pdf">https://www2.illinois.gov/Documents/ExecOrders/2020/ExecutiveOrder-2020-04.pdf</a></li> </ul>                                                                                                                                                                                                                                                                                                                                                                                                                                                                            |
| Illinois  | 3/16/20 |   |   | P | <ul style="list-style-type: none"> <li>• <a href="https://www2.illinois.gov/Documents/ExecOrders/2020/ExecutiveOrder-2020-07.pdf">https://www2.illinois.gov/Documents/ExecOrders/2020/ExecutiveOrder-2020-07.pdf</a></li> </ul>                                                                                                                                                                                                                                                                                                                                                                                                                                                                            |
| Illinois  | 3/17/20 | P |   |   | <ul style="list-style-type: none"> <li>• <a href="https://www2.illinois.gov/Documents/ExecOrders/2020/ExecutiveOrder-2020-05.pdf">https://www2.illinois.gov/Documents/ExecOrders/2020/ExecutiveOrder-2020-05.pdf</a></li> </ul>                                                                                                                                                                                                                                                                                                                                                                                                                                                                            |
| Illinois  | 3/21/20 |   | P | P | <ul style="list-style-type: none"> <li>• <a href="https://www2.illinois.gov/Documents/ExecOrders/2020/ExecutiveOrder-2020-10.pdf">https://www2.illinois.gov/Documents/ExecOrders/2020/ExecutiveOrder-2020-10.pdf</a></li> </ul>                                                                                                                                                                                                                                                                                                                                                                                                                                                                            |
| Indiana   | 3/16/20 |   |   | P | <ul style="list-style-type: none"> <li>• <a href="https://www.in.gov/gov/files/ExecutiveOrder20-04FurtherOrdersforPublicHealthEmergency.pdf">https://www.in.gov/gov/files/ExecutiveOrder20-04FurtherOrdersforPublicHealthEmergency.pdf</a></li> </ul>                                                                                                                                                                                                                                                                                                                                                                                                                                                      |
| Indiana   | 3/19/20 | P |   |   | <ul style="list-style-type: none"> <li>• <a href="https://www.in.gov/gov/files/EO_20-05.pdf">https://www.in.gov/gov/files/EO_20-05.pdf</a></li> </ul>                                                                                                                                                                                                                                                                                                                                                                                                                                                                                                                                                      |
| Indiana   | 3/24/20 |   | P | P | <ul style="list-style-type: none"> <li>• <a href="https://www.in.gov/gov/files/Executive_Order_20-08_Stay_at_Home.pdf">https://www.in.gov/gov/files/Executive_Order_20-08_Stay_at_Home.pdf</a></li> </ul>                                                                                                                                                                                                                                                                                                                                                                                                                                                                                                  |
| Iowa      | 3/17/20 |   |   | P | <ul style="list-style-type: none"> <li>• <a href="https://governor.iowa.gov/sites/default/files/documents/Public%20Health%20Proclamation%20-%202020.03.17.pdf">https://governor.iowa.gov/sites/default/files/documents/Public%20Health%20Proclamation%20-%202020.03.17.pdf</a></li> </ul>                                                                                                                                                                                                                                                                                                                                                                                                                  |
| Iowa      | 3/22/20 |   |   | P | <ul style="list-style-type: none"> <li>• <a href="https://governor.iowa.gov/sites/default/files/documents/Public%20Health%20Proclamation%20-%202020.03.22.pdf">https://governor.iowa.gov/sites/default/files/documents/Public%20Health%20Proclamation%20-%202020.03.22.pdf</a></li> </ul>                                                                                                                                                                                                                                                                                                                                                                                                                  |
| Iowa      | 3/26/20 |   |   | P | <ul style="list-style-type: none"> <li>• <a href="https://governor.iowa.gov/sites/default/files/documents/Public%20Health%20Proclamation%20-%202020.03.26.pdf">https://governor.iowa.gov/sites/default/files/documents/Public%20Health%20Proclamation%20-%202020.03.26.pdf</a></li> </ul>                                                                                                                                                                                                                                                                                                                                                                                                                  |
| Kansas    | 3/17/20 | P |   | P | <ul style="list-style-type: none"> <li>• <a href="https://governor.kansas.gov/wp-content/uploads/2020/03/20-04-Executed.pdf">https://governor.kansas.gov/wp-content/uploads/2020/03/20-04-Executed.pdf</a></li> <li>• <a href="https://governor.kansas.gov/wp-content/uploads/2020/03/EO-20-07-Executed.pdf">https://governor.kansas.gov/wp-content/uploads/2020/03/EO-20-07-Executed.pdf</a></li> </ul>                                                                                                                                                                                                                                                                                                   |
| Kansas    | 3/19/20 |   |   | P | <ul style="list-style-type: none"> <li>• <a href="https://khap2.kdhe.state.ks.us/NewsRelease/PDFs/3-19-20%20203-19-20%20REVISED%20Mandate%20for%20quarantine%20and%20isolation%20of%20travelers,%20close%20contacts,%20those%20being%20tested.pdf">https://khap2.kdhe.state.ks.us/NewsRelease/PDFs/3-19-20%20203-19-20%20REVISED%20Mandate%20for%20quarantine%20and%20isolation%20of%20travelers,%20close%20contacts,%20those%20being%20tested.pdf</a></li> <li>• <a href="https://khap2.kdhe.state.ks.us/NewsRelease/PDFs/3-23-2020%20Updates.pdf">https://khap2.kdhe.state.ks.us/NewsRelease/PDFs/3-23-2020%20Updates.pdf</a></li> </ul>                                                                 |
| Kansas    | 3/25/20 |   |   | P | <ul style="list-style-type: none"> <li>• <a href="https://governor.kansas.gov/wp-content/uploads/2020/03/EO-20-14-Executed.pdf">https://governor.kansas.gov/wp-content/uploads/2020/03/EO-20-14-Executed.pdf</a></li> </ul>                                                                                                                                                                                                                                                                                                                                                                                                                                                                                |
| Kansas    | 3/30/20 |   | P | P | <ul style="list-style-type: none"> <li>• <a href="https://governor.kansas.gov/wp-content/uploads/2020/03/EO20-16.pdf">https://governor.kansas.gov/wp-content/uploads/2020/03/EO20-16.pdf</a></li> </ul>                                                                                                                                                                                                                                                                                                                                                                                                                                                                                                    |
| Kentucky  | 3/18/20 |   |   | P | <ul style="list-style-type: none"> <li>• <a href="https://governor.ky.gov/attachments/20200317_Order_Public-Facing-Businesses.pdf">https://governor.ky.gov/attachments/20200317_Order_Public-Facing-Businesses.pdf</a></li> </ul>                                                                                                                                                                                                                                                                                                                                                                                                                                                                          |
| Kentucky  | 3/19/20 |   |   | P | <ul style="list-style-type: none"> <li>• <a href="https://governor.ky.gov/attachments/20200319_Order_Mass-Gatherings.pdf">https://governor.ky.gov/attachments/20200319_Order_Mass-Gatherings.pdf</a></li> </ul>                                                                                                                                                                                                                                                                                                                                                                                                                                                                                            |
| Kentucky  | 3/23/20 |   | P |   | <ul style="list-style-type: none"> <li>• <a href="https://governor.ky.gov/attachments/20200322_Executive-Order_2020-246_Retail.pdf">https://governor.ky.gov/attachments/20200322_Executive-Order_2020-246_Retail.pdf</a></li> </ul>                                                                                                                                                                                                                                                                                                                                                                                                                                                                        |
| Louisiana | 3/13/20 | P |   |   | <ul style="list-style-type: none"> <li>• <a href="https://www.louisianabelieves.com/docs/default-source/covid-19-resources/27-jbe-2020-covid-19.pdf">https://www.louisianabelieves.com/docs/default-source/covid-19-resources/27-jbe-2020-covid-19.pdf</a></li> </ul>                                                                                                                                                                                                                                                                                                                                                                                                                                      |
| Louisiana | 3/17/20 |   |   | P | <ul style="list-style-type: none"> <li>• <a href="https://gov.louisiana.gov/assets/Proclamations/2020/Proc-No-30-updTED.pdf">https://gov.louisiana.gov/assets/Proclamations/2020/Proc-No-30-updTED.pdf</a></li> </ul>                                                                                                                                                                                                                                                                                                                                                                                                                                                                                      |
| Louisiana | 3/23/20 |   | P | P | <ul style="list-style-type: none"> <li>• <a href="https://gov.louisiana.gov/assets/Proclamations/2020/33-JBE-2020-Public-Health-Emergency.pdf">https://gov.louisiana.gov/assets/Proclamations/2020/33-JBE-2020-Public-Health-Emergency.pdf</a></li> </ul>                                                                                                                                                                                                                                                                                                                                                                                                                                                  |
| Maine     | 3/18/20 |   |   | P | <ul style="list-style-type: none"> <li>• <a href="https://www.maine.gov/governor/mills/sites/maine.gov.governor.mills/files/inline-files/EO%2014%20An%20Order%20to%20Protect%20Public%20Health.pdf">https://www.maine.gov/governor/mills/sites/maine.gov.governor.mills/files/inline-files/EO%2014%20An%20Order%20to%20Protect%20Public%20Health.pdf</a></li> </ul>                                                                                                                                                                                                                                                                                                                                        |

|               |         |   |   |                                                                                                                                                                                                                                                                                                                                                                                                                                                                                                                                                                                                                               |                                                                                                                                                                                                                                                                                                                                                                                                                                                                                                                                                                                                                                                            |                                                                                                                                                                                                                     |
|---------------|---------|---|---|-------------------------------------------------------------------------------------------------------------------------------------------------------------------------------------------------------------------------------------------------------------------------------------------------------------------------------------------------------------------------------------------------------------------------------------------------------------------------------------------------------------------------------------------------------------------------------------------------------------------------------|------------------------------------------------------------------------------------------------------------------------------------------------------------------------------------------------------------------------------------------------------------------------------------------------------------------------------------------------------------------------------------------------------------------------------------------------------------------------------------------------------------------------------------------------------------------------------------------------------------------------------------------------------------|---------------------------------------------------------------------------------------------------------------------------------------------------------------------------------------------------------------------|
| Maine         | 3/25/20 | P |   | <ul style="list-style-type: none"> <li>• <a href="https://www.maine.gov/governor/mills/sites/maine.gov.governor.mills/files/inline-files/An%20Order%20Regarding%20Essential%20Businesses%20and%20Operations%20_0.pdf">https://www.maine.gov/governor/mills/sites/maine.gov.governor.mills/files/inline-files/An%20Order%20Regarding%20Essential%20Businesses%20and%20Operations%20_0.pdf</a></li> </ul>                                                                                                                                                                                                                       |                                                                                                                                                                                                                                                                                                                                                                                                                                                                                                                                                                                                                                                            |                                                                                                                                                                                                                     |
| Maryland      | 3/12/20 |   | P | <ul style="list-style-type: none"> <li>• <a href="https://governor.maryland.gov/wp-content/uploads/2020/03/Prohibiting-Large-Gatherings.pdf">https://governor.maryland.gov/wp-content/uploads/2020/03/Prohibiting-Large-Gatherings.pdf</a></li> </ul>                                                                                                                                                                                                                                                                                                                                                                         |                                                                                                                                                                                                                                                                                                                                                                                                                                                                                                                                                                                                                                                            |                                                                                                                                                                                                                     |
| Maryland      | 3/16/20 | P | P | <ul style="list-style-type: none"> <li>• <a href="https://governor.maryland.gov/wp-content/uploads/2020/03/Prohibiting-Large-Gatherings.pdf">https://governor.maryland.gov/wp-content/uploads/2020/03/Prohibiting-Large-Gatherings.pdf</a></li> <li>• <a href="https://governor.maryland.gov/wp-content/uploads/2020/03/Executive-Order-Amending-Large-Gatherings.pdf">https://governor.maryland.gov/wp-content/uploads/2020/03/Executive-Order-Amending-Large-Gatherings.pdf</a></li> <li>• <a href="http://marylandpublicschools.org/Pages/default.aspx">http://marylandpublicschools.org/Pages/default.aspx</a></li> </ul> |                                                                                                                                                                                                                                                                                                                                                                                                                                                                                                                                                                                                                                                            |                                                                                                                                                                                                                     |
| Maryland      | 3/23/20 |   | P | <ul style="list-style-type: none"> <li>• <a href="https://governor.maryland.gov/wp-content/uploads/2020/03/Gatherings-THIRD-AMENDED-3.23.20.pdf">https://governor.maryland.gov/wp-content/uploads/2020/03/Gatherings-THIRD-AMENDED-3.23.20.pdf</a></li> </ul>                                                                                                                                                                                                                                                                                                                                                                 |                                                                                                                                                                                                                                                                                                                                                                                                                                                                                                                                                                                                                                                            |                                                                                                                                                                                                                     |
| Maryland      | 3/30/20 |   | P | P                                                                                                                                                                                                                                                                                                                                                                                                                                                                                                                                                                                                                             | <ul style="list-style-type: none"> <li>• <a href="https://governor.maryland.gov/wp-content/uploads/2020/03/Gatherings-FOURTH-AMENDED-3.30.20.pdf">https://governor.maryland.gov/wp-content/uploads/2020/03/Gatherings-FOURTH-AMENDED-3.30.20.pdf</a></li> </ul>                                                                                                                                                                                                                                                                                                                                                                                            |                                                                                                                                                                                                                     |
| Massachusetts | 3/13/20 |   |   | P                                                                                                                                                                                                                                                                                                                                                                                                                                                                                                                                                                                                                             | <ul style="list-style-type: none"> <li>• <a href="https://www.mass.gov/doc/order-prohibiting-gatherings-of-more-than-250-people/download">https://www.mass.gov/doc/order-prohibiting-gatherings-of-more-than-250-people/download</a></li> </ul>                                                                                                                                                                                                                                                                                                                                                                                                            |                                                                                                                                                                                                                     |
| Massachusetts | 3/16/20 |   |   | P                                                                                                                                                                                                                                                                                                                                                                                                                                                                                                                                                                                                                             | <ul style="list-style-type: none"> <li>• <a href="https://www.mass.gov/doc/march-16-2020-k-12-school-closing-order/download">https://www.mass.gov/doc/march-16-2020-k-12-school-closing-order/download</a></li> </ul>                                                                                                                                                                                                                                                                                                                                                                                                                                      |                                                                                                                                                                                                                     |
| Massachusetts | 3/17/20 |   |   | P                                                                                                                                                                                                                                                                                                                                                                                                                                                                                                                                                                                                                             | <ul style="list-style-type: none"> <li>• <a href="https://www.mass.gov/doc/march-15-2020-large-gatherings-25-and-restaurants-order">https://www.mass.gov/doc/march-15-2020-large-gatherings-25-and-restaurants-order</a></li> </ul>                                                                                                                                                                                                                                                                                                                                                                                                                        |                                                                                                                                                                                                                     |
| Massachusetts | 3/24/20 |   | P | P                                                                                                                                                                                                                                                                                                                                                                                                                                                                                                                                                                                                                             | <ul style="list-style-type: none"> <li>• <a href="https://www.mass.gov/doc/march-23-2020-essential-services-and-revised-gatherings-order">https://www.mass.gov/doc/march-23-2020-essential-services-and-revised-gatherings-order</a></li> <li>• <a href="https://www.mass.gov/news/governor-charlie-baker-orders-all-non-essential-businesses-to-cess-in-person-operation">https://www.mass.gov/news/governor-charlie-baker-orders-all-non-essential-businesses-to-cess-in-person-operation</a></li> </ul>                                                                                                                                                 |                                                                                                                                                                                                                     |
| Massachusetts | 3/27/20 |   |   |                                                                                                                                                                                                                                                                                                                                                                                                                                                                                                                                                                                                                               | P                                                                                                                                                                                                                                                                                                                                                                                                                                                                                                                                                                                                                                                          | <ul style="list-style-type: none"> <li>• <a href="https://www.mass.gov/info-details/travel-information-related-to-covid-19">https://www.mass.gov/info-details/travel-information-related-to-covid-19</a></li> </ul> |
| Michigan      | 3/16/20 |   |   | P                                                                                                                                                                                                                                                                                                                                                                                                                                                                                                                                                                                                                             | <ul style="list-style-type: none"> <li>• <a href="https://www.michigan.gov/whitmer/0,9309,7-387-90499_90705-521595--,00.html">https://www.michigan.gov/whitmer/0,9309,7-387-90499_90705-521595--,00.html</a></li> </ul>                                                                                                                                                                                                                                                                                                                                                                                                                                    |                                                                                                                                                                                                                     |
| Michigan      | 3/22/20 |   |   | P                                                                                                                                                                                                                                                                                                                                                                                                                                                                                                                                                                                                                             | <ul style="list-style-type: none"> <li>• <a href="https://www.michigan.gov/whitmer/0,9309,7-387-90499_90705-522576--,00.html">https://www.michigan.gov/whitmer/0,9309,7-387-90499_90705-522576--,00.html</a></li> </ul>                                                                                                                                                                                                                                                                                                                                                                                                                                    |                                                                                                                                                                                                                     |
| Michigan      | 3/24/20 |   | P | P                                                                                                                                                                                                                                                                                                                                                                                                                                                                                                                                                                                                                             | <ul style="list-style-type: none"> <li>• <a href="https://www.michigan.gov/whitmer/0,9309,7-387-90499_90705-522626--,00.html">https://www.michigan.gov/whitmer/0,9309,7-387-90499_90705-522626--,00.html</a></li> </ul>                                                                                                                                                                                                                                                                                                                                                                                                                                    |                                                                                                                                                                                                                     |
| Minnesota     | 3/17/20 |   |   | P                                                                                                                                                                                                                                                                                                                                                                                                                                                                                                                                                                                                                             | <ul style="list-style-type: none"> <li>• <a href="https://mn.gov/governor/assets/2020_03_16_FO_20_04_Bars_Restaurants_tcm1055-423380.pdf">https://mn.gov/governor/assets/2020_03_16_FO_20_04_Bars_Restaurants_tcm1055-423380.pdf</a></li> </ul>                                                                                                                                                                                                                                                                                                                                                                                                            |                                                                                                                                                                                                                     |
| Minnesota     | 3/18/20 |   |   | P                                                                                                                                                                                                                                                                                                                                                                                                                                                                                                                                                                                                                             | <ul style="list-style-type: none"> <li>• <a href="https://www.leg.state.mn.us/archive/execorders/20-02.pdf">https://www.leg.state.mn.us/archive/execorders/20-02.pdf</a></li> </ul>                                                                                                                                                                                                                                                                                                                                                                                                                                                                        |                                                                                                                                                                                                                     |
| Minnesota     | 3/27/20 |   | P | P                                                                                                                                                                                                                                                                                                                                                                                                                                                                                                                                                                                                                             | <ul style="list-style-type: none"> <li>• <a href="http://mn.gov/governor/covid-19/news/index.jsp?id=1055-424820">http://mn.gov/governor/covid-19/news/index.jsp?id=1055-424820</a></li> </ul>                                                                                                                                                                                                                                                                                                                                                                                                                                                              |                                                                                                                                                                                                                     |
| Mississippi   | 3/19/20 |   |   | P                                                                                                                                                                                                                                                                                                                                                                                                                                                                                                                                                                                                                             | <ul style="list-style-type: none"> <li>• <a href="https://www.sos.ms.gov/Education-Publications/ExecutiveOrders/1460.pdf">https://www.sos.ms.gov/Education-Publications/ExecutiveOrders/1460.pdf</a></li> </ul>                                                                                                                                                                                                                                                                                                                                                                                                                                            |                                                                                                                                                                                                                     |
| Mississippi   | 3/24/20 |   |   | P                                                                                                                                                                                                                                                                                                                                                                                                                                                                                                                                                                                                                             | <ul style="list-style-type: none"> <li>• <a href="https://www.sos.ms.gov/Education-Publications/ExecutiveOrders/1463.pdf">https://www.sos.ms.gov/Education-Publications/ExecutiveOrders/1463.pdf</a></li> </ul>                                                                                                                                                                                                                                                                                                                                                                                                                                            |                                                                                                                                                                                                                     |
| Missouri      | 3/17/20 |   |   | P                                                                                                                                                                                                                                                                                                                                                                                                                                                                                                                                                                                                                             | <ul style="list-style-type: none"> <li>• <a href="https://governor.mo.gov/press-releases/archive/what-you-need-know-missouris-guidelines-combat-spread-covid-19">https://governor.mo.gov/press-releases/archive/what-you-need-know-missouris-guidelines-combat-spread-covid-19</a></li> </ul>                                                                                                                                                                                                                                                                                                                                                              |                                                                                                                                                                                                                     |
| Missouri      | 3/19/20 |   |   | P                                                                                                                                                                                                                                                                                                                                                                                                                                                                                                                                                                                                                             | <ul style="list-style-type: none"> <li>• <a href="https://dese.mo.gov/communications/coronavirus-covid-19-information">https://dese.mo.gov/communications/coronavirus-covid-19-information</a></li> </ul>                                                                                                                                                                                                                                                                                                                                                                                                                                                  |                                                                                                                                                                                                                     |
| Missouri      | 3/23/20 |   |   | P                                                                                                                                                                                                                                                                                                                                                                                                                                                                                                                                                                                                                             | <ul style="list-style-type: none"> <li>• <a href="https://governor.mo.gov/press-releases/archive/governor-parson-directs-dhss-director-require-social-distancing-statewide">https://governor.mo.gov/press-releases/archive/governor-parson-directs-dhss-director-require-social-distancing-statewide</a></li> </ul>                                                                                                                                                                                                                                                                                                                                        |                                                                                                                                                                                                                     |
| Missouri      | 3/23/20 |   |   | P                                                                                                                                                                                                                                                                                                                                                                                                                                                                                                                                                                                                                             | <ul style="list-style-type: none"> <li>• <a href="https://governor.mo.gov/press-releases/archive/governor-parson-directs-dhss-director-require-social-distancing-statewide">https://governor.mo.gov/press-releases/archive/governor-parson-directs-dhss-director-require-social-distancing-statewide</a></li> </ul>                                                                                                                                                                                                                                                                                                                                        |                                                                                                                                                                                                                     |
| Montana       | 3/16/20 |   |   | P                                                                                                                                                                                                                                                                                                                                                                                                                                                                                                                                                                                                                             | <ul style="list-style-type: none"> <li>• <a href="http://governor.mt.gov/Pressroom/governor-bullock-directs-the-closure-of-public-k-12-schools-for-two-weeks-strongly-recommends-social-distancing-measures-to-slow-the-spread-of-covid-19">http://governor.mt.gov/Pressroom/governor-bullock-directs-the-closure-of-public-k-12-schools-for-two-weeks-strongly-recommends-social-distancing-measures-to-slow-the-spread-of-covid-19</a></li> <li>• <a href="http://governor.mt.gov/Portals/16/Closure%20Extensions%20and%20Social%20Distancing.pdf">http://governor.mt.gov/Portals/16/Closure%20Extensions%20and%20Social%20Distancing.pdf</a></li> </ul> |                                                                                                                                                                                                                     |
| Montana       | 3/20/20 |   |   | P                                                                                                                                                                                                                                                                                                                                                                                                                                                                                                                                                                                                                             | <ul style="list-style-type: none"> <li>• <a href="http://governor.mt.gov/Pressroom/governor-bullock-announces-closure-of-dine-in-food-service-and-alcoholic-beverage-businesses-and-other-activities-that-pose-enhanced-risks-to-curtail-spread-of-covid-19">http://governor.mt.gov/Pressroom/governor-bullock-announces-closure-of-dine-in-food-service-and-alcoholic-beverage-businesses-and-other-activities-that-pose-enhanced-risks-to-curtail-spread-of-covid-19</a></li> </ul>                                                                                                                                                                      |                                                                                                                                                                                                                     |
| Montana       | 3/28/20 |   | P | P                                                                                                                                                                                                                                                                                                                                                                                                                                                                                                                                                                                                                             | <ul style="list-style-type: none"> <li>• <a href="https://covid19.mt.gov/Portals/223/Documents/Stay%20at%20Home%20Directive.pdf">https://covid19.mt.gov/Portals/223/Documents/Stay%20at%20Home%20Directive.pdf</a></li> </ul>                                                                                                                                                                                                                                                                                                                                                                                                                              |                                                                                                                                                                                                                     |
| Nebraska      | 3/16/20 |   |   | P                                                                                                                                                                                                                                                                                                                                                                                                                                                                                                                                                                                                                             | <ul style="list-style-type: none"> <li>• <a href="https://governor.nebraska.gov/press/gov-ricketts-further-limits-events-gatherings-prevent-covid-19-spread">https://governor.nebraska.gov/press/gov-ricketts-further-limits-events-gatherings-prevent-covid-19-spread</a></li> </ul>                                                                                                                                                                                                                                                                                                                                                                      |                                                                                                                                                                                                                     |
| Nevada        | 3/16/20 |   |   | P                                                                                                                                                                                                                                                                                                                                                                                                                                                                                                                                                                                                                             | <ul style="list-style-type: none"> <li>• <a href="http://www.doe.nv.gov/uploadedFiles/ndedoenvgov/content/home/DeclarationofEmergencyDirectiveSchools.pdf">http://www.doe.nv.gov/uploadedFiles/ndedoenvgov/content/home/DeclarationofEmergencyDirectiveSchools.pdf</a></li> </ul>                                                                                                                                                                                                                                                                                                                                                                          |                                                                                                                                                                                                                     |

|                |         |   |   |   |   |                                                                                                                                                                                                                                                                                                                                                                                                                                                                                                                                                              |
|----------------|---------|---|---|---|---|--------------------------------------------------------------------------------------------------------------------------------------------------------------------------------------------------------------------------------------------------------------------------------------------------------------------------------------------------------------------------------------------------------------------------------------------------------------------------------------------------------------------------------------------------------------|
| Nevada         | 3/17/20 |   | P |   |   | <ul style="list-style-type: none"> <li>• <a href="http://gov.nv.gov/News/Emergency_Orders/2020/2020-03-18_-_COVID-19_Declaration_of_Emergency_Directive_002/">http://gov.nv.gov/News/Emergency_Orders/2020/2020-03-18_-_COVID-19_Declaration_of_Emergency_Directive_002/</a></li> <li>• <a href="http://gov.nv.gov/News/Press/2020/Governor_Sisolak_Announces_COVID-19_Risk_Mitigation_Initiatives/">http://gov.nv.gov/News/Press/2020/Governor_Sisolak_Announces_COVID-19_Risk_Mitigation_Initiatives/</a></li> </ul>                                       |
| Nevada         | 3/20/20 |   | P |   |   | <ul style="list-style-type: none"> <li>• <a href="http://gov.nv.gov/News/Emergency_Orders/2020/2020-03-20_-_COVID-19_Declaration_of_Emergency_Directive_003/">http://gov.nv.gov/News/Emergency_Orders/2020/2020-03-20_-_COVID-19_Declaration_of_Emergency_Directive_003/</a></li> <li>• <a href="https://nvhealthresponse.nv.gov/wp-content/uploads/2020/03/3.20-Press-Release.pdf">https://nvhealthresponse.nv.gov/wp-content/uploads/2020/03/3.20-Press-Release.pdf</a></li> </ul>                                                                         |
| Nevada         | 3/24/20 |   | P |   |   | <ul style="list-style-type: none"> <li>• <a href="https://nvhealthresponse.nv.gov/wp-content/uploads/2020/03/03.24-PUBLIC-GATHERING-DIRECTIVE_.pdf">https://nvhealthresponse.nv.gov/wp-content/uploads/2020/03/03.24-PUBLIC-GATHERING-DIRECTIVE_.pdf</a></li> </ul>                                                                                                                                                                                                                                                                                          |
| New Hampshire  | 3/16/20 | P |   | P |   | <ul style="list-style-type: none"> <li>• <a href="https://www.governor.nh.gov/news-media/orders-2020/documents/emergency-order-2.pdf">https://www.governor.nh.gov/news-media/orders-2020/documents/emergency-order-2.pdf</a></li> <li>• <a href="https://www.governor.nh.gov/news-media/orders-2020/documents/emergency-order-1.pdf">https://www.governor.nh.gov/news-media/orders-2020/documents/emergency-order-1.pdf</a></li> </ul>                                                                                                                       |
| New Hampshire  | 3/23/20 |   |   | P |   | <ul style="list-style-type: none"> <li>• <a href="https://www.governor.nh.gov/news-media/emergency-orders/documents/emergency-order-16.pdf">https://www.governor.nh.gov/news-media/emergency-orders/documents/emergency-order-16.pdf</a></li> </ul>                                                                                                                                                                                                                                                                                                          |
| New Hampshire  | 3/27/20 |   | P |   | P | <ul style="list-style-type: none"> <li>• <a href="https://www.governor.nh.gov/news-media/emergency-orders/documents/emergency-order-17-1.pdf">https://www.governor.nh.gov/news-media/emergency-orders/documents/emergency-order-17-1.pdf</a></li> </ul>                                                                                                                                                                                                                                                                                                      |
| New Jersey     | 3/16/20 |   |   | P |   | <ul style="list-style-type: none"> <li>• <a href="https://nj.gov/infobank/eo/056murphy/pdf/EO-104.pdf">https://nj.gov/infobank/eo/056murphy/pdf/EO-104.pdf</a></li> </ul>                                                                                                                                                                                                                                                                                                                                                                                    |
| New Jersey     | 3/18/20 |   |   |   |   | <ul style="list-style-type: none"> <li>• <a href="https://nj.gov/governor/news/news/562020/approved/20200316c.shtml">https://nj.gov/governor/news/news/562020/approved/20200316c.shtml</a></li> <li>• <a href="https://nj.gov/infobank/eo/056murphy/pdf/EO-104.pdf">https://nj.gov/infobank/eo/056murphy/pdf/EO-104.pdf</a></li> </ul>                                                                                                                                                                                                                       |
| New Jersey     | 3/21/20 | P | P | P | P | <ul style="list-style-type: none"> <li>• <a href="https://nj.gov/infobank/eo/056murphy/pdf/EO-107.pdf">https://nj.gov/infobank/eo/056murphy/pdf/EO-107.pdf</a></li> </ul>                                                                                                                                                                                                                                                                                                                                                                                    |
| New Jersey     | 4/1/20  |   |   | P |   | <ul style="list-style-type: none"> <li>• <a href="https://nj.gov/infobank/eo/056murphy/pdf/EO-110.pdf">https://nj.gov/infobank/eo/056murphy/pdf/EO-110.pdf</a></li> </ul>                                                                                                                                                                                                                                                                                                                                                                                    |
| New Mexico     | 3/16/20 | P |   | P |   | <ul style="list-style-type: none"> <li>• <a href="https://www.governor.state.nm.us/wp-content/uploads/2020/03/Executive-Order-2020-005.pdf">https://www.governor.state.nm.us/wp-content/uploads/2020/03/Executive-Order-2020-005.pdf</a></li> <li>• <a href="https://www.governor.state.nm.us/2020/03/15/health-secretary-to-amend-public-health-order-adding-new-restrictions-to-public-gatherings/">https://www.governor.state.nm.us/2020/03/15/health-secretary-to-amend-public-health-order-adding-new-restrictions-to-public-gatherings/</a></li> </ul> |
| New Mexico     | 3/19/20 |   |   | P |   | <ul style="list-style-type: none"> <li>• <a href="https://www.governor.state.nm.us/2020/03/18/new-mexico-to-order-additional-closures-to-limit-spread-of-covid-19/">https://www.governor.state.nm.us/2020/03/18/new-mexico-to-order-additional-closures-to-limit-spread-of-covid-19/</a></li> <li>• <a href="https://www.governor.state.nm.us/wp-content/uploads/2020/03/SIGNED_UPDATED_DOH_PHO.pdf">https://www.governor.state.nm.us/wp-content/uploads/2020/03/SIGNED_UPDATED_DOH_PHO.pdf</a></li> </ul>                                                   |
| New Mexico     | 3/24/20 |   | P |   | P | <ul style="list-style-type: none"> <li>• <a href="https://www.governor.state.nm.us/wp-content/uploads/2020/03/COVID-19-DOH-Order-fv.pdf">https://www.governor.state.nm.us/wp-content/uploads/2020/03/COVID-19-DOH-Order-fv.pdf</a></li> </ul>                                                                                                                                                                                                                                                                                                                |
| New York       | 3/16/20 |   |   | P |   | <ul style="list-style-type: none"> <li>• <a href="https://www.governor.ny.gov/news/no-2023-continuing-temporary-suspension-and-modification-laws-relating-disaster-emergency">https://www.governor.ny.gov/news/no-2023-continuing-temporary-suspension-and-modification-laws-relating-disaster-emergency</a></li> </ul>                                                                                                                                                                                                                                      |
| New York       | 3/18/20 | P |   |   |   | <ul style="list-style-type: none"> <li>• <a href="https://www.governor.ny.gov/news/no-2024-continuing-temporary-suspension-and-modification-laws-relating-disaster-emergency">https://www.governor.ny.gov/news/no-2024-continuing-temporary-suspension-and-modification-laws-relating-disaster-emergency</a></li> </ul>                                                                                                                                                                                                                                      |
| New York       | 3/20/20 |   |   | P |   | <ul style="list-style-type: none"> <li>• <a href="https://www.governor.ny.gov/news/no-2026-continuing-temporary-suspension-and-modification-laws-relating-disaster-emergency">https://www.governor.ny.gov/news/no-2026-continuing-temporary-suspension-and-modification-laws-relating-disaster-emergency</a></li> </ul>                                                                                                                                                                                                                                      |
| New York       | 3/21/20 |   | P |   | P | <ul style="list-style-type: none"> <li>• <a href="https://www.governor.ny.gov/news/no-2027-continuing-temporary-suspension-and-modification-laws-relating-disaster-emergency">https://www.governor.ny.gov/news/no-2027-continuing-temporary-suspension-and-modification-laws-relating-disaster-emergency</a></li> </ul>                                                                                                                                                                                                                                      |
| New York       | 3/22/20 |   | P |   | P | <ul style="list-style-type: none"> <li>• <a href="https://www.governor.ny.gov/news/governor-cuomo-signs-new-york-state-pause-executive-order">https://www.governor.ny.gov/news/governor-cuomo-signs-new-york-state-pause-executive-order</a></li> </ul>                                                                                                                                                                                                                                                                                                      |
| North Carolina | 3/16/20 | P |   | P |   | <ul style="list-style-type: none"> <li>• <a href="https://files.nc.gov/governor/documents/files/EO117-COVID-19-Prohibiting-Mass-Gathering-and-K12-School-Closure.pdf">https://files.nc.gov/governor/documents/files/EO117-COVID-19-Prohibiting-Mass-Gathering-and-K12-School-Closure.pdf</a></li> </ul>                                                                                                                                                                                                                                                      |
| North Carolina | 3/17/20 |   |   | P |   | <ul style="list-style-type: none"> <li>• <a href="https://files.nc.gov/governor/documents/files/EO118.pdf">https://files.nc.gov/governor/documents/files/EO118.pdf</a></li> </ul>                                                                                                                                                                                                                                                                                                                                                                            |
| North Carolina | 3/25/20 |   |   | P |   | <ul style="list-style-type: none"> <li>• <a href="https://files.nc.gov/governor/documents/files/EO120.pdf">https://files.nc.gov/governor/documents/files/EO120.pdf</a></li> </ul>                                                                                                                                                                                                                                                                                                                                                                            |
| North Carolina | 3/30/20 |   | P |   | P | <ul style="list-style-type: none"> <li>• <a href="https://files.nc.gov/governor/documents/files/EO121-Stay-at-Home-Order-3.pdf">https://files.nc.gov/governor/documents/files/EO121-Stay-at-Home-Order-3.pdf</a></li> </ul>                                                                                                                                                                                                                                                                                                                                  |
| North Dakota   | 3/16/20 | P |   |   |   | <ul style="list-style-type: none"> <li>• <a href="https://www.governor.nd.gov/sites/www/files/documents/Executive%20Order%202020-04%20COVID-19%20school%20closing.pdf">https://www.governor.nd.gov/sites/www/files/documents/Executive%20Order%202020-04%20COVID-19%20school%20closing.pdf</a></li> </ul>                                                                                                                                                                                                                                                    |
| North Dakota   | 3/20/20 |   |   | P |   | <ul style="list-style-type: none"> <li>• <a href="https://www.governor.nd.gov/sites/www/files/documents/executive-orders/Executive%20Order%202020-06.pdf">https://www.governor.nd.gov/sites/www/files/documents/executive-orders/Executive%20Order%202020-06.pdf</a></li> </ul>                                                                                                                                                                                                                                                                              |



|                |         |   |   |   |                                                                                                                                                                                                                                                                                                                                                                                                                                                                                                                                                                                                                                                                    |
|----------------|---------|---|---|---|--------------------------------------------------------------------------------------------------------------------------------------------------------------------------------------------------------------------------------------------------------------------------------------------------------------------------------------------------------------------------------------------------------------------------------------------------------------------------------------------------------------------------------------------------------------------------------------------------------------------------------------------------------------------|
| North Dakota   | 3/28/20 | P | P |   | <ul style="list-style-type: none"> <li>• <a href="https://www.governor.nd.gov/sites/www/files/documents/executive-orders/Executive%20Order%202020-6.1%20expanded%20business%20closures.pdf">https://www.governor.nd.gov/sites/www/files/documents/executive-orders/Executive%20Order%202020-6.1%20expanded%20business%20closures.pdf</a></li> </ul>                                                                                                                                                                                                                                                                                                                |
| Ohio           | 3/15/20 |   | P |   | <ul style="list-style-type: none"> <li>• <a href="https://coronavirus.ohio.gov/wps/wcm/connect/gov/aa5aa123-c6c9-4e95-8a0d-bc77409c7296/Health+Director+Order+Limit+Food%2C+Alcohol+Sales+to+Carry+Out+Delivery+Only.pdf">https://coronavirus.ohio.gov/wps/wcm/connect/gov/aa5aa123-c6c9-4e95-8a0d-bc77409c7296/Health+Director+Order+Limit+Food%2C+Alcohol+Sales+to+Carry+Out+Delivery+Only.pdf</a></li> </ul>                                                                                                                                                                                                                                                    |
| Ohio           | 3/16/20 | P |   |   | <ul style="list-style-type: none"> <li>• <a href="https://governor.ohio.gov/wps/portal/gov/governor/media/news-and-media/announces-school-closures">https://governor.ohio.gov/wps/portal/gov/governor/media/news-and-media/announces-school-closures</a></li> </ul>                                                                                                                                                                                                                                                                                                                                                                                                |
| Ohio           | 3/17/20 |   | P |   | <ul style="list-style-type: none"> <li>• <a href="https://coronavirus.ohio.gov/wps/wcm/connect/gov/dd504af3-ae2c-4d2e-b2bd-02c1a3beed89/Director%27s+Order+-+Amended+Mass+Gathering+3.17.20+%281%29.pdf">https://coronavirus.ohio.gov/wps/wcm/connect/gov/dd504af3-ae2c-4d2e-b2bd-02c1a3beed89/Director%27s+Order+-+Amended+Mass+Gathering+3.17.20+%281%29.pdf</a></li> </ul>                                                                                                                                                                                                                                                                                      |
| Ohio           | 3/21/20 |   | P |   | <ul style="list-style-type: none"> <li>• <a href="https://coronavirus.ohio.gov/wps/wcm/connect/gov/56be4a6a-3305-4697-97da-582d7b45da2f/Directors+Order+-+Internet+Cafes+03.21.20.pdf">https://coronavirus.ohio.gov/wps/wcm/connect/gov/56be4a6a-3305-4697-97da-582d7b45da2f/Directors+Order+-+Internet+Cafes+03.21.20.pdf</a></li> </ul>                                                                                                                                                                                                                                                                                                                          |
| Ohio           | 3/23/20 | P | P |   | <ul style="list-style-type: none"> <li>• <a href="https://governor.ohio.gov/static/DirectorsOrderStayAtHome.pdf">https://governor.ohio.gov/static/DirectorsOrderStayAtHome.pdf</a></li> </ul>                                                                                                                                                                                                                                                                                                                                                                                                                                                                      |
| Oklahoma       | 3/17/20 | P |   |   | <ul style="list-style-type: none"> <li>• <a href="https://twitter.com/oksde/status/1239662538289184768">https://twitter.com/oksde/status/1239662538289184768</a></li> </ul>                                                                                                                                                                                                                                                                                                                                                                                                                                                                                        |
| Oklahoma       | 3/25/20 | P | P |   | <ul style="list-style-type: none"> <li>• <a href="https://www.sos.ok.gov/documents/executive/1919.pdf">https://www.sos.ok.gov/documents/executive/1919.pdf</a></li> </ul>                                                                                                                                                                                                                                                                                                                                                                                                                                                                                          |
| Oregon         | 3/16/20 |   | P |   | <ul style="list-style-type: none"> <li>• <a href="https://www.oregon.gov/gov/Documents/executive_orders/eo_20-05.pdf">https://www.oregon.gov/gov/Documents/executive_orders/eo_20-05.pdf</a></li> </ul>                                                                                                                                                                                                                                                                                                                                                                                                                                                            |
| Oregon         | 3/16/20 | P |   |   | <ul style="list-style-type: none"> <li>• <a href="https://www.oregon.gov/gov/Documents/executive_orders/eo_20-08.pdf">https://www.oregon.gov/gov/Documents/executive_orders/eo_20-08.pdf</a></li> </ul>                                                                                                                                                                                                                                                                                                                                                                                                                                                            |
| Oregon         | 3/17/20 |   | P |   | <ul style="list-style-type: none"> <li>• <a href="https://www.oregon.gov/gov/Documents/executive_orders/eo_20-07.pdf">https://www.oregon.gov/gov/Documents/executive_orders/eo_20-07.pdf</a></li> </ul>                                                                                                                                                                                                                                                                                                                                                                                                                                                            |
| Oregon         | 3/23/20 | P | P |   | <ul style="list-style-type: none"> <li>• <a href="https://govsite-assets.s3.amazonaws.com/jkAULYKcSh6DoDF8wBM0_EO%2020-12.pdf">https://govsite-assets.s3.amazonaws.com/jkAULYKcSh6DoDF8wBM0_EO%2020-12.pdf</a></li> </ul>                                                                                                                                                                                                                                                                                                                                                                                                                                          |
| Pennsylvania   | 3/16/20 | P |   |   | <ul style="list-style-type: none"> <li>• <a href="https://www.education.pa.gov/Schools/safeschools/emergencyplanning/COVID-19/messages/Pages/March-15,-2020.aspx">https://www.education.pa.gov/Schools/safeschools/emergencyplanning/COVID-19/messages/Pages/March-15,-2020.aspx</a></li> </ul>                                                                                                                                                                                                                                                                                                                                                                    |
| Pennsylvania   | 3/17/20 |   | P |   | <ul style="list-style-type: none"> <li>• <a href="https://www.governor.pa.gov/wp-content/uploads/2020/03/20200319-TWW-COVID-19-business-closure-order.pdf">https://www.governor.pa.gov/wp-content/uploads/2020/03/20200319-TWW-COVID-19-business-closure-order.pdf</a></li> <li>• <a href="https://www.governor.pa.gov/newsroom/gov-wolf-puts-statewide-covid-19-mitigation-efforts-in-effect-stresses-need-for-every-pennsylvanian-to-take-action-to-stop-the-spread/">https://www.governor.pa.gov/newsroom/gov-wolf-puts-statewide-covid-19-mitigation-efforts-in-effect-stresses-need-for-every-pennsylvanian-to-take-action-to-stop-the-spread/</a></li> </ul> |
| Pennsylvania   | 3/21/20 | P |   |   | <ul style="list-style-type: none"> <li>• <a href="https://www.governor.pa.gov/wp-content/uploads/2020/03/20200319-TWW-COVID-19-business-closure-order.pdf">https://www.governor.pa.gov/wp-content/uploads/2020/03/20200319-TWW-COVID-19-business-closure-order.pdf</a></li> </ul>                                                                                                                                                                                                                                                                                                                                                                                  |
| Puerto Rico    | 3/15/20 | P | P |   | <ul style="list-style-type: none"> <li>• <a href="https://www.estado.pr.gov/en/executive-orders/">https://www.estado.pr.gov/en/executive-orders/</a></li> </ul>                                                                                                                                                                                                                                                                                                                                                                                                                                                                                                    |
| Rhode Island   | 3/17/20 |   | P |   | <ul style="list-style-type: none"> <li>• <a href="http://www.governor.ri.gov/documents/orders/Executive-Order-20-04.pdf">http://www.governor.ri.gov/documents/orders/Executive-Order-20-04.pdf</a></li> </ul>                                                                                                                                                                                                                                                                                                                                                                                                                                                      |
| Rhode Island   | 3/23/20 | P | P |   | <ul style="list-style-type: none"> <li>• <a href="https://www.ri.gov/press/view/37961">https://www.ri.gov/press/view/37961</a></li> <li>• <a href="http://www.governor.ri.gov/documents/orders/Executive-Order-20-09.pdf">http://www.governor.ri.gov/documents/orders/Executive-Order-20-09.pdf</a></li> </ul>                                                                                                                                                                                                                                                                                                                                                     |
| Rhode Island   | 3/24/20 |   | P | P | <ul style="list-style-type: none"> <li>• <a href="http://www.governor.ri.gov/documents/orders/Executive-Order-20-10.pdf">http://www.governor.ri.gov/documents/orders/Executive-Order-20-10.pdf</a></li> </ul>                                                                                                                                                                                                                                                                                                                                                                                                                                                      |
| Rhode Island   | 3/30/20 | P | P | P | <ul style="list-style-type: none"> <li>• <a href="http://www.governor.ri.gov/documents/orders/Executive-Order-20-14.pdf">http://www.governor.ri.gov/documents/orders/Executive-Order-20-14.pdf</a></li> </ul>                                                                                                                                                                                                                                                                                                                                                                                                                                                      |
| South Carolina | 3/16/20 | P |   |   | <ul style="list-style-type: none"> <li>• <a href="https://governor.sc.gov/sites/default/files/Documents/Executive-Orders/2020-03-15%20FILED%20Executive%20Order%20No.%202020-09%20-%20Closing%20Schools%20Cancelling%20Elections%20Other%20Provisions%20Due%20to%20COVID-19.pdf">https://governor.sc.gov/sites/default/files/Documents/Executive-Orders/2020-03-15%20FILED%20Executive%20Order%20No.%202020-09%20-%20Closing%20Schools%20Cancelling%20Elections%20Other%20Provisions%20Due%20to%20COVID-19.pdf</a></li> </ul>                                                                                                                                      |
| South Carolina | 3/18/20 |   | P |   | <ul style="list-style-type: none"> <li>• <a href="https://governor.sc.gov/sites/default/files/Documents/Executive-Orders/2020-03-17%20eFILED%20Executive%20Order%20No.%202020-10%20-%20Directing%20Additional%20Emergency%20Measures%20Due%20to%20COVID-19.pdf">https://governor.sc.gov/sites/default/files/Documents/Executive-Orders/2020-03-17%20eFILED%20Executive%20Order%20No.%202020-10%20-%20Directing%20Additional%20Emergency%20Measures%20Due%20to%20COVID-19.pdf</a></li> </ul>                                                                                                                                                                        |
| South Carolina | 3/23/20 |   | P |   | <ul style="list-style-type: none"> <li>• <a href="https://governor.sc.gov/sites/default/files/Documents/Executive-Orders/2020-03-23%20eFILED%20Executive%20Order%20No.%202020-13%20-%20Authorizing%20Law%20Enforcement%20to%20Preserve%20Public%20Health.pdf">https://governor.sc.gov/sites/default/files/Documents/Executive-Orders/2020-03-23%20eFILED%20Executive%20Order%20No.%202020-13%20-%20Authorizing%20Law%20Enforcement%20to%20Preserve%20Public%20Health.pdf</a></li> </ul>                                                                                                                                                                            |
| South Carolina | 3/27/20 |   | P |   | <ul style="list-style-type: none"> <li>• <a href="https://governor.sc.gov/sites/default/files/Documents/Executive-Orders/2020-03-27%20eFILED%20Executive%20Order%20No.%202020-14%20-%20Self-Quarantine%20for%20Individuals%20from%20High-Risk%20Areas.pdf">https://governor.sc.gov/sites/default/files/Documents/Executive-Orders/2020-03-27%20eFILED%20Executive%20Order%20No.%202020-14%20-%20Self-Quarantine%20for%20Individuals%20from%20High-Risk%20Areas.pdf</a></li> </ul>                                                                                                                                                                                  |

|              |         |   |   |                                                                                                                                                                                                                                                                                                                                                                                                                                                                                                                                                                                                                                                                                                                                                                                                                                                                         |
|--------------|---------|---|---|-------------------------------------------------------------------------------------------------------------------------------------------------------------------------------------------------------------------------------------------------------------------------------------------------------------------------------------------------------------------------------------------------------------------------------------------------------------------------------------------------------------------------------------------------------------------------------------------------------------------------------------------------------------------------------------------------------------------------------------------------------------------------------------------------------------------------------------------------------------------------|
| South Dakota | 3/23/20 |   | P | <ul style="list-style-type: none"> <li>• <a href="https://sdsos.gov/general-information/executive-actions/executive-orders/assets/2020-08.PDF">https://sdsos.gov/general-information/executive-actions/executive-orders/assets/2020-08.PDF</a></li> </ul>                                                                                                                                                                                                                                                                                                                                                                                                                                                                                                                                                                                                               |
| South Dakota | 3/24/20 | P |   | <ul style="list-style-type: none"> <li>• <a href="https://doe.sd.gov/coronavirus/">https://doe.sd.gov/coronavirus/</a></li> </ul>                                                                                                                                                                                                                                                                                                                                                                                                                                                                                                                                                                                                                                                                                                                                       |
| South Dakota | 3/29/20 |   | P | <ul style="list-style-type: none"> <li>• <a href="https://sdsos.gov/general-information/executive-actions/executive-orders/assets/2020-09.PDF">https://sdsos.gov/general-information/executive-actions/executive-orders/assets/2020-09.PDF</a></li> </ul>                                                                                                                                                                                                                                                                                                                                                                                                                                                                                                                                                                                                               |
| Tennessee    | 3/20/20 | P |   | <ul style="list-style-type: none"> <li>• <a href="https://www.tn.gov/education/news/2020/3/16/statement-from-commissioner-penny-schwinn-on-school-closures.html">https://www.tn.gov/education/news/2020/3/16/statement-from-commissioner-penny-schwinn-on-school-closures.html</a></li> </ul>                                                                                                                                                                                                                                                                                                                                                                                                                                                                                                                                                                           |
| Tennessee    | 3/23/20 |   | P | <ul style="list-style-type: none"> <li>• <a href="https://sos-tn-gov-files.tnsosfiles.com/forms/exec-order-lee17.pdf">https://sos-tn-gov-files.tnsosfiles.com/forms/exec-order-lee17.pdf</a></li> </ul>                                                                                                                                                                                                                                                                                                                                                                                                                                                                                                                                                                                                                                                                 |
| Tennessee    | 3/23/20 |   | P | <ul style="list-style-type: none"> <li>• <a href="https://sos-tn-gov-files.tnsosfiles.com/forms/exec-order-lee17.pdf">https://sos-tn-gov-files.tnsosfiles.com/forms/exec-order-lee17.pdf</a></li> </ul>                                                                                                                                                                                                                                                                                                                                                                                                                                                                                                                                                                                                                                                                 |
| Texas        | 3/20/20 | P | P | <ul style="list-style-type: none"> <li>• <a href="https://gov.texas.gov/uploads/files/press/EO-GA_08_COVID-19_preparedness_and_mitigation_FINAL_03-19-2020_1.pdf">https://gov.texas.gov/uploads/files/press/EO-GA_08_COVID-19_preparedness_and_mitigation_FINAL_03-19-2020_1.pdf</a></li> <li>• <a href="https://tea.texas.gov/sites/default/files/Texas%20School%20Closures%20as%20of%20March%2015th%20at%201-45pm.pdf">https://tea.texas.gov/sites/default/files/Texas%20School%20Closures%20as%20of%20March%2015th%20at%201-45pm.pdf</a></li> </ul>                                                                                                                                                                                                                                                                                                                  |
| Texas        | 3/28/20 |   | P | <ul style="list-style-type: none"> <li>• <a href="https://gov.texas.gov/uploads/files/press/EO-GA-11_airport_travel_reporting_COVID-19_IMAGE_03-26-2020.pdf">https://gov.texas.gov/uploads/files/press/EO-GA-11_airport_travel_reporting_COVID-19_IMAGE_03-26-2020.pdf</a></li> </ul>                                                                                                                                                                                                                                                                                                                                                                                                                                                                                                                                                                                   |
| Utah         | 3/16/20 | P |   | <ul style="list-style-type: none"> <li>• <a href="https://governor.utah.gov/2020/03/13/gov-herbert-announces-two-week-dismissal-of-utahs-public-schools/">https://governor.utah.gov/2020/03/13/gov-herbert-announces-two-week-dismissal-of-utahs-public-schools/</a></li> </ul>                                                                                                                                                                                                                                                                                                                                                                                                                                                                                                                                                                                         |
| Utah         | 3/18/20 |   | P | <ul style="list-style-type: none"> <li>• <a href="https://governor.utah.gov/2020/03/18/state-orders-restaurants-bars-to-suspend-dine-in-services-to-slow-spread-of-covid-19/">https://governor.utah.gov/2020/03/18/state-orders-restaurants-bars-to-suspend-dine-in-services-to-slow-spread-of-covid-19/</a></li> </ul>                                                                                                                                                                                                                                                                                                                                                                                                                                                                                                                                                 |
| Utah         | 3/21/20 |   | P | <ul style="list-style-type: none"> <li>• <a href="https://drive.google.com/file/d/1Kp9RJEmiB_SCbWIEP4bo5e_c464SsCMW/view">https://drive.google.com/file/d/1Kp9RJEmiB_SCbWIEP4bo5e_c464SsCMW/view</a></li> </ul>                                                                                                                                                                                                                                                                                                                                                                                                                                                                                                                                                                                                                                                         |
| Vermont      | 3/13/20 |   | P | <ul style="list-style-type: none"> <li>• <a href="https://governor.vermont.gov/sites/scott/files/documents/EO%2001-20%20Declaration%20of%20State%20of%20Emergency%20in%20Response%20to%20COVID-19%20and%20National%20Guard%20Call-Out.pdf">https://governor.vermont.gov/sites/scott/files/documents/EO%2001-20%20Declaration%20of%20State%20of%20Emergency%20in%20Response%20to%20COVID-19%20and%20National%20Guard%20Call-Out.pdf</a></li> </ul>                                                                                                                                                                                                                                                                                                                                                                                                                       |
| Vermont      | 3/16/20 |   | P | <ul style="list-style-type: none"> <li>• <a href="https://governor.vermont.gov/content/addendum-1-executive-order-01-20">https://governor.vermont.gov/content/addendum-1-executive-order-01-20</a></li> </ul>                                                                                                                                                                                                                                                                                                                                                                                                                                                                                                                                                                                                                                                           |
| Vermont      | 3/17/20 |   | P | <ul style="list-style-type: none"> <li>• <a href="https://governor.vermont.gov/content/addendum-2-executive-order-01-20">https://governor.vermont.gov/content/addendum-2-executive-order-01-20</a></li> </ul>                                                                                                                                                                                                                                                                                                                                                                                                                                                                                                                                                                                                                                                           |
| Vermont      | 3/18/20 | P |   | <ul style="list-style-type: none"> <li>• <a href="https://education.vermont.gov/press-release/governor-scott-orders-orderly-closure-vermont-schools">https://education.vermont.gov/press-release/governor-scott-orders-orderly-closure-vermont-schools</a></li> </ul>                                                                                                                                                                                                                                                                                                                                                                                                                                                                                                                                                                                                   |
| Vermont      | 3/23/20 | P | P | <ul style="list-style-type: none"> <li>• <a href="https://governor.vermont.gov/sites/scott/files/documents/ADDENDUM%204%20TO%20EXECUTIVE%20ORDER%2001-20.pdf">https://governor.vermont.gov/sites/scott/files/documents/ADDENDUM%204%20TO%20EXECUTIVE%20ORDER%2001-20.pdf</a></li> <li>• <a href="https://governor.vermont.gov/sites/scott/files/documents/ADDENDUM%205%20TO%20EXECUTIVE%20ORDER%2001-20.pdf">https://governor.vermont.gov/sites/scott/files/documents/ADDENDUM%205%20TO%20EXECUTIVE%20ORDER%2001-20.pdf</a></li> </ul>                                                                                                                                                                                                                                                                                                                                  |
| Vermont      | 3/25/20 | P | P | <ul style="list-style-type: none"> <li>• <a href="https://governor.vermont.gov/sites/scott/files/documents/ADDENDUM%206%20TO%20EXECUTIVE%20ORDER%2001-20.pdf">https://governor.vermont.gov/sites/scott/files/documents/ADDENDUM%206%20TO%20EXECUTIVE%20ORDER%2001-20.pdf</a></li> </ul>                                                                                                                                                                                                                                                                                                                                                                                                                                                                                                                                                                                 |
| Vermont      | 3/30/20 |   | P | <ul style="list-style-type: none"> <li>• <a href="https://governor.vermont.gov/sites/scott/files/documents/ADDENDUM%207%20TO%20EXECUTIVE%20ORDER%2001-20.pdf">https://governor.vermont.gov/sites/scott/files/documents/ADDENDUM%207%20TO%20EXECUTIVE%20ORDER%2001-20.pdf</a></li> </ul>                                                                                                                                                                                                                                                                                                                                                                                                                                                                                                                                                                                 |
| Virginia     | 3/12/20 | P | P | <ul style="list-style-type: none"> <li>• <a href="https://www.governor.virginia.gov/newsroom/all-releases/2020/march/headline-853537-en.html">https://www.governor.virginia.gov/newsroom/all-releases/2020/march/headline-853537-en.html</a></li> </ul>                                                                                                                                                                                                                                                                                                                                                                                                                                                                                                                                                                                                                 |
| Virginia     | 3/16/20 | P | P | <ul style="list-style-type: none"> <li>• <a href="https://www.governor.virginia.gov/newsroom/all-releases/2020/march/headline-854442-en.html">https://www.governor.virginia.gov/newsroom/all-releases/2020/march/headline-854442-en.html</a></li> <li>• <a href="https://www.governor.virginia.gov/newsroom/all-releases/2020/march/headline-855292-en.html">https://www.governor.virginia.gov/newsroom/all-releases/2020/march/headline-855292-en.html</a></li> <li>• <a href="https://www.governor.virginia.gov/media/governorvirginiagov/governor-of-virginia/pdf/Order-of-the-Governor-and-State-Health-Commissioner-Declaration-of-Public-Health-Emergency.pdf">https://www.governor.virginia.gov/media/governorvirginiagov/governor-of-virginia/pdf/Order-of-the-Governor-and-State-Health-Commissioner-Declaration-of-Public-Health-Emergency.pdf</a></li> </ul> |
| Virginia     | 3/24/20 |   | P | <ul style="list-style-type: none"> <li>• <a href="https://www.governor.virginia.gov/media/governorvirginiagov/executive-actions/EO-53-Temporary-Restrictions-Due-To-Novel-Coronavirus-(COVID-19).pdf">https://www.governor.virginia.gov/media/governorvirginiagov/executive-actions/EO-53-Temporary-Restrictions-Due-To-Novel-Coronavirus-(COVID-19).pdf</a></li> </ul>                                                                                                                                                                                                                                                                                                                                                                                                                                                                                                 |
| Virginia     | 3/30/20 | P | P | <ul style="list-style-type: none"> <li>• <a href="https://www.governor.virginia.gov/media/governorvirginiagov/executive-actions/EO-55-Temporary-Stay-at-Home-Order-Due-to-Novel-Coronavirus-(COVID-19).pdf">https://www.governor.virginia.gov/media/governorvirginiagov/executive-actions/EO-55-Temporary-Stay-at-Home-Order-Due-to-Novel-Coronavirus-(COVID-19).pdf</a></li> </ul>                                                                                                                                                                                                                                                                                                                                                                                                                                                                                     |
| Washington   | 3/10/20 |   | P | <ul style="list-style-type: none"> <li>• <a href="https://www.governor.wa.gov/sites/default/files/proclamations/20-06%20Coronavirus%20%28tmp%29.pdf">https://www.governor.wa.gov/sites/default/files/proclamations/20-06%20Coronavirus%20%28tmp%29.pdf</a></li> </ul>                                                                                                                                                                                                                                                                                                                                                                                                                                                                                                                                                                                                   |

|               |         |  |   |   |                                                                                                                                                                                                                                                                                                                                                                           |                                                                                                                                                                                                                                                                                                                                                         |                                                                                                                                                                                                 |
|---------------|---------|--|---|---|---------------------------------------------------------------------------------------------------------------------------------------------------------------------------------------------------------------------------------------------------------------------------------------------------------------------------------------------------------------------------|---------------------------------------------------------------------------------------------------------------------------------------------------------------------------------------------------------------------------------------------------------------------------------------------------------------------------------------------------------|-------------------------------------------------------------------------------------------------------------------------------------------------------------------------------------------------|
| Washington    | 3/13/20 |  |   | P | <ul style="list-style-type: none"> <li>• <a href="https://www.governor.wa.gov/sites/default/files/proclamations/20-11%20Coronavirus%20Gatherings%20Amendment%20%28tmp%29.pdf">https://www.governor.wa.gov/sites/default/files/proclamations/20-11%20Coronavirus%20Gatherings%20Amendment%20%28tmp%29.pdf</a></li> </ul>                                                   |                                                                                                                                                                                                                                                                                                                                                         |                                                                                                                                                                                                 |
| Washington    | 3/16/20 |  |   | P | <ul style="list-style-type: none"> <li>• <a href="https://www.governor.wa.gov/sites/default/files/proclamations/20-13%20Coronavirus%20Restaurants-Bars%20%28tmp%29.pdf">https://www.governor.wa.gov/sites/default/files/proclamations/20-13%20Coronavirus%20Restaurants-Bars%20%28tmp%29.pdf</a></li> </ul>                                                               |                                                                                                                                                                                                                                                                                                                                                         |                                                                                                                                                                                                 |
| Washington    | 3/17/20 |  |   | P | <ul style="list-style-type: none"> <li>• <a href="https://www.governor.wa.gov/sites/default/files/proclamations/20-09%20Coronavirus%20Schools%20Amendment%20%28tmp%29.pdf">https://www.governor.wa.gov/sites/default/files/proclamations/20-09%20Coronavirus%20Schools%20Amendment%20%28tmp%29.pdf</a></li> </ul>                                                         |                                                                                                                                                                                                                                                                                                                                                         |                                                                                                                                                                                                 |
| Washington    | 3/23/20 |  | P | P | P                                                                                                                                                                                                                                                                                                                                                                         | <ul style="list-style-type: none"> <li>• <a href="https://www.governor.wa.gov/sites/default/files/proclamations/20-25%20Coronavirus%20Stay%20Safe-Stay%20Healthy%20%28tmp%29%20%28002%29.pdf">https://www.governor.wa.gov/sites/default/files/proclamations/20-25%20Coronavirus%20Stay%20Safe-Stay%20Healthy%20%28tmp%29%20%28002%29.pdf</a></li> </ul> |                                                                                                                                                                                                 |
| West Virginia | 3/13/20 |  |   | P | <ul style="list-style-type: none"> <li>• <a href="https://governor.wv.gov/News/press-releases/2020/Pages/COVID19-UPDATE-Gov.-Justice-announces-closure-of-West-Virginia-schools.aspx">https://governor.wv.gov/News/press-releases/2020/Pages/COVID19-UPDATE-Gov.-Justice-announces-closure-of-West-Virginia-schools.aspx</a></li> </ul>                                   |                                                                                                                                                                                                                                                                                                                                                         |                                                                                                                                                                                                 |
| West Virginia | 3/17/20 |  |   | P | <ul style="list-style-type: none"> <li>• <a href="https://governor.wv.gov/News/press-releases/2020/Pages/COVID-19-UPDATE-Gov.-Justice-holds-statewide-address-to-discuss-coronavirus-precautions.aspx">https://governor.wv.gov/News/press-releases/2020/Pages/COVID-19-UPDATE-Gov.-Justice-holds-statewide-address-to-discuss-coronavirus-precautions.aspx</a></li> </ul> |                                                                                                                                                                                                                                                                                                                                                         |                                                                                                                                                                                                 |
| West Virginia | 3/19/20 |  |   | P | <ul style="list-style-type: none"> <li>• <a href="https://governor.wv.gov/Documents/2020%20Executive%20Orders/Executive-Order-March-19-2020.pdf">https://governor.wv.gov/Documents/2020%20Executive%20Orders/Executive-Order-March-19-2020.pdf</a></li> </ul>                                                                                                             |                                                                                                                                                                                                                                                                                                                                                         |                                                                                                                                                                                                 |
| West Virginia | 3/20/20 |  |   | P | <ul style="list-style-type: none"> <li>• <a href="https://governor.wv.gov/Documents/2020%20Executive%20Orders/Executive-Order-March-20-2020-Barbers-Salons.pdf">https://governor.wv.gov/Documents/2020%20Executive%20Orders/Executive-Order-March-20-2020-Barbers-Salons.pdf</a></li> </ul>                                                                               |                                                                                                                                                                                                                                                                                                                                                         |                                                                                                                                                                                                 |
| West Virginia | 3/24/20 |  | P |   | P                                                                                                                                                                                                                                                                                                                                                                         | <ul style="list-style-type: none"> <li>• <a href="https://governor.wv.gov/Documents/2020%20Executive%20Orders/STAY-AT-HOME-ORDER-MARCH-23-2020.pdf">https://governor.wv.gov/Documents/2020%20Executive%20Orders/STAY-AT-HOME-ORDER-MARCH-23-2020.pdf</a></li> </ul>                                                                                     |                                                                                                                                                                                                 |
| West Virginia | 3/31/20 |  |   | P |                                                                                                                                                                                                                                                                                                                                                                           | P                                                                                                                                                                                                                                                                                                                                                       | <ul style="list-style-type: none"> <li>• <a href="https://governor.wv.gov/Documents/SGovernor%27s20033014470.pdf">https://governor.wv.gov/Documents/SGovernor%27s20033014470.pdf</a></li> </ul> |
| Wisconsin     | 3/17/20 |  |   | P | <ul style="list-style-type: none"> <li>• <a href="https://content.govdelivery.com/attachments/WIGOV/2020/03/16/file_attachments/1402207/DHS%20Order%20M%20ass%20Gatherings%20of%2050%20or%20More.pdf">https://content.govdelivery.com/attachments/WIGOV/2020/03/16/file_attachments/1402207/DHS%20Order%20M%20ass%20Gatherings%20of%2050%20or%20More.pdf</a></li> </ul>   |                                                                                                                                                                                                                                                                                                                                                         |                                                                                                                                                                                                 |
| Wisconsin     | 3/17/20 |  |   | P | <ul style="list-style-type: none"> <li>• <a href="https://evers.wi.gov/Documents/COVID19/UPDATEDOrder10People.pdf">https://evers.wi.gov/Documents/COVID19/UPDATEDOrder10People.pdf</a></li> </ul>                                                                                                                                                                         |                                                                                                                                                                                                                                                                                                                                                         |                                                                                                                                                                                                 |
| Wisconsin     | 3/18/20 |  |   | P | <ul style="list-style-type: none"> <li>• <a href="https://evers.wi.gov/Documents/EO/SignedSchoolClosure.pdf">https://evers.wi.gov/Documents/EO/SignedSchoolClosure.pdf</a></li> </ul>                                                                                                                                                                                     |                                                                                                                                                                                                                                                                                                                                                         |                                                                                                                                                                                                 |
| Wisconsin     | 3/25/20 |  | P |   | P                                                                                                                                                                                                                                                                                                                                                                         | <ul style="list-style-type: none"> <li>• <a href="https://content.govdelivery.com/attachments/WIGOV/2020/03/24/file_attachments/1409408/Health%20Order%20%2312%20Safer%20At%20Home.pdf">https://content.govdelivery.com/attachments/WIGOV/2020/03/24/file_attachments/1409408/Health%20Order%20%2312%20Safer%20At%20Home.pdf</a></li> </ul>             |                                                                                                                                                                                                 |
| Wyoming       | 3/19/20 |  | P |   | P                                                                                                                                                                                                                                                                                                                                                                         | <ul style="list-style-type: none"> <li>• <a href="https://health.wyo.gov/wp-content/uploads/2020/03/Statewide-Order-3.19.2020.pdf">https://health.wyo.gov/wp-content/uploads/2020/03/Statewide-Order-3.19.2020.pdf</a></li> </ul>                                                                                                                       |                                                                                                                                                                                                 |
| Wyoming       | 3/20/20 |  |   | P | <ul style="list-style-type: none"> <li>• <a href="https://health.wyo.gov/wp-content/uploads/2020/03/March-20-gatherings-order.pdf">https://health.wyo.gov/wp-content/uploads/2020/03/March-20-gatherings-order.pdf</a></li> </ul>                                                                                                                                         |                                                                                                                                                                                                                                                                                                                                                         |                                                                                                                                                                                                 |
| Wyoming       | 3/25/20 |  |   | P | <ul style="list-style-type: none"> <li>• <a href="https://health.wyo.gov/governor-state-health-officer-issue-third-closure-order/">https://health.wyo.gov/governor-state-health-officer-issue-third-closure-order/</a></li> </ul>                                                                                                                                         |                                                                                                                                                                                                                                                                                                                                                         |                                                                                                                                                                                                 |

*Notes: A, closure of schools; B, closure of workplaces; C, cancellation of public events; D, restrictions on internal movement; E, closure of state borders*

**eTable 2.** Sensitivity analyses for the effect of implementation of any statewide social distancing measure on daily epidemic growth rate

| <b>Model</b>                                                                                                                      | <b>Estimated coefficient</b> | <b>95% confidence interval</b> | <b>P-value</b> |
|-----------------------------------------------------------------------------------------------------------------------------------|------------------------------|--------------------------------|----------------|
| Unadjusted estimate with 3-day incubation period                                                                                  | <b>-0.008</b>                | <b>-0.014, -0.002</b>          | <b>0.008</b>   |
| Adjusted for population density and day of week                                                                                   | -0.006                       | -0.012, -0.000                 | 0.041          |
| Unadjusted estimate with 4-day incubation period                                                                                  | -0.006                       | -0.012, -0.000                 | 0.028          |
| Unadjusted estimate with 5-day incubation period                                                                                  | -0.005                       | -0.011, -0.000                 | 0.070          |
| Unadjusted estimate, among states with <100 cases at the time the first statewide social distancing measure was implemented       | -0.001                       | -0.011, 0.008                  | 0.789          |
| Unadjusted estimate, among states with $\geq$ 100 cases at the time the first statewide social distancing measure was implemented | 0.010                        | -0.138, 0.157                  | 0.900          |

*Notes: Each row corresponds to a separate regression model fitted to the data. The primary analysis is based on a regression model that specifies a 3-day incubation period and that includes 3 variables: time in days, implementation period, and a time-by-implementation period product term.*

**eTable 3.** Sensitivity analyses for the effect of implementation of statewide restriction on internal movement on daily epidemic growth rate

| <b>Model</b>                                                                                                                       | <b>Estimated coefficient</b> | <b>95% confidence interval</b> | <b>P-value</b> |
|------------------------------------------------------------------------------------------------------------------------------------|------------------------------|--------------------------------|----------------|
| Unadjusted estimate with 3-day incubation period                                                                                   | <b>0.003</b>                 | <b>-0.014, 0.020</b>           | <b>0.72</b>    |
| Adjusted for population density and day of week                                                                                    | 0.005                        | -0.011, 0.023                  | 0.51           |
| Unadjusted estimate with 4-day incubation period                                                                                   | 0.006                        | -0.016, 0.029                  | 0.59           |
| Unadjusted estimate with 5-day incubation period                                                                                   | 0.011                        | -0.021, 0.042                  | 0.51           |
| Unadjusted estimate, among states with <500 cases at the time the statewide restriction on internal movement was implemented       | -0.002                       | -0.011, 0.007                  | 0.69           |
| Unadjusted estimate, among states with $\geq$ 500 cases at the time the statewide restriction on internal movement was implemented | 0.010                        | -0.029, 0.048                  | 0.62           |

*Notes: Each row corresponds to a separate regression model fitted to the data. The primary analysis is based on a regression model that specifies a 3-day incubation period and that includes 3 variables: time in days, implementation period, and a time-by-implementation period product term.*

**eFigure.** Timeline of implementation of first statewide social distancing measures and statewide restrictions on internal movement

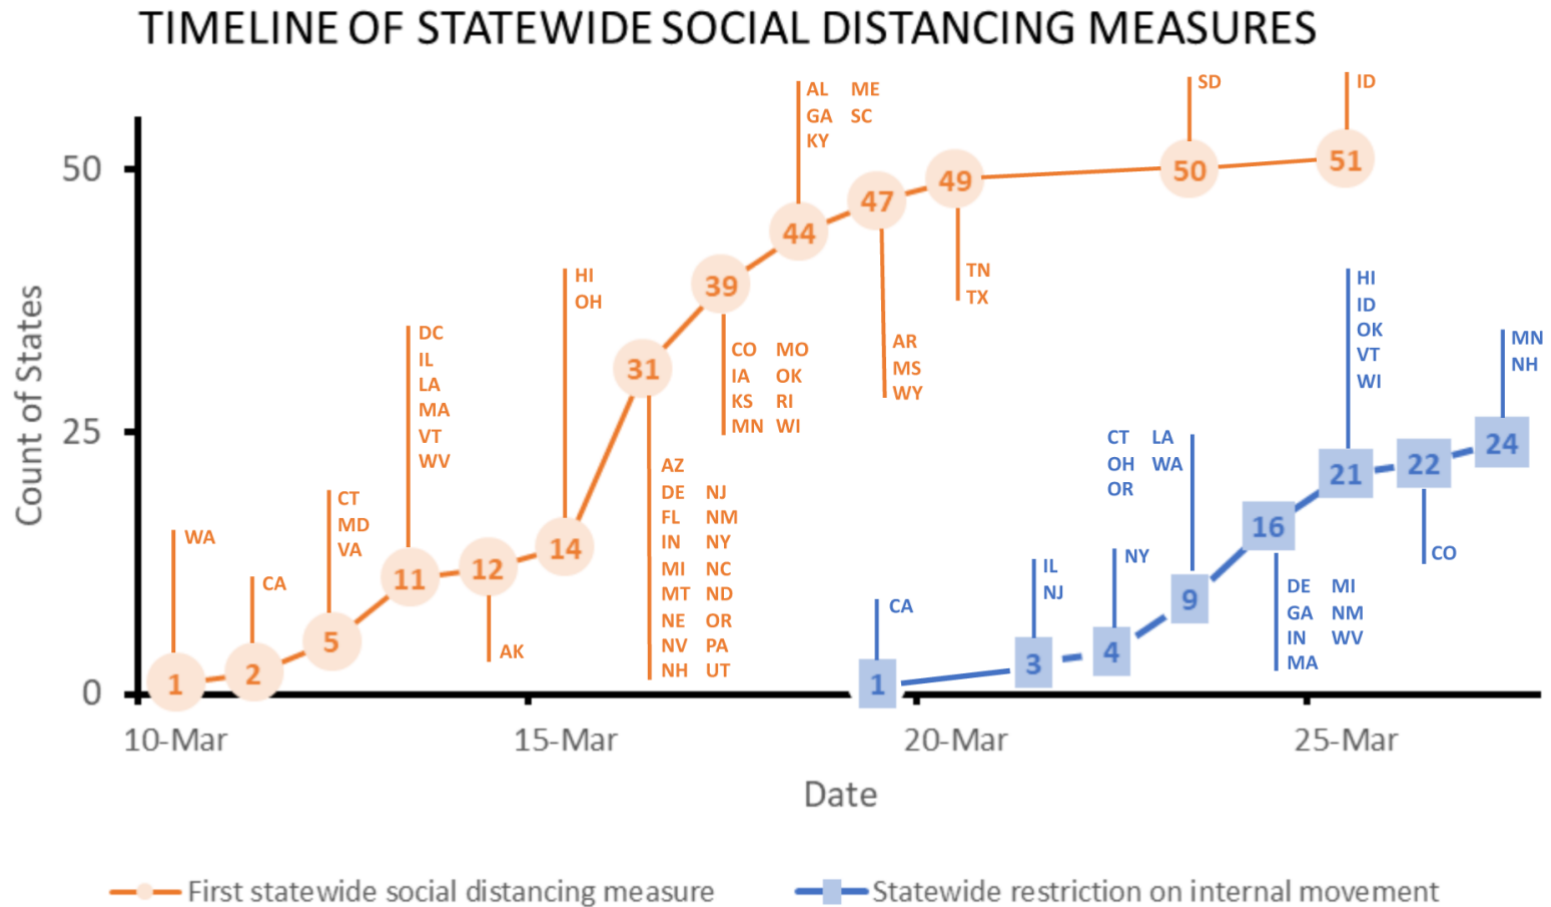

## SUPPLEMENTARY APPENDIX REFERENCES

1. Petherick A, Hale T, Phillips T, Webster S. Variation in government responses to COVID-19. Blavatnik School Working Paper. Oxford: Blavatnik School of Government, University of Oxford; 2020.
2. Lee VJ, Aguilera X, Heymann D, Wilder-Smith A, Lancet Infectious Diseases C. Preparedness for emerging epidemic threats: a Lancet Infectious Diseases Commission. *Lancet Infect Dis* 2020;20(1):17-19.
3. Grassly NC, Fraser C. Mathematical models of infectious disease transmission. *Nat Rev Microbiol* 2008;6(6):477-487.
4. Lewis MD, Pavlin JA, Mansfield JL, O'Brien S, Boomsma LG, Elbert Y, et al. Disease outbreak detection system using syndromic data in the greater Washington DC area. *Am J Prev Med* 2002;23(3):180-186.
5. Buckingham-Jeffery E, Morbey R, House T, Elliot AJ, Harcourt S, Smith GE. Correcting for day of the week and public holiday effects: improving a national daily syndromic surveillance service for detecting public health threats. *BMC Public Health* 2017;17(1):477.
6. Lauer SA, Grantz KH, Bi Q, Jones FK, Zheng Q, Meredith HR, et al. The incubation period of coronavirus disease 2019 (COVID-19) from publicly reported confirmed cases: estimation and application. *Ann Intern Med* 2020; Epub 10 Mar 2020. doi:2010.7326/M2020-0504.
7. Hatchett RJ, Mecher CE, Lipsitch M. Public health interventions and epidemic intensity during the 1918 influenza pandemic. *Proc Natl Acad Sci U S A* 2007;104(18):7582-7587.
